# Supplementary material
Source: publisher figshare collection journal article supplement (https://acs.figshare.com/ndownloader/files/22388088)
Supplement: Supplementary file 1 [file 22388088]

## Supporting Information

### **Excited State Turn-On of Auophilicity and Tunability of Relativistic Effects in a Series of Digold Triazolates Synthesized via iClick**

Charles J. Zeman IV,<sup>a,b</sup> Yu-Hsuan Shen,<sup>a</sup> Jessica K. Heller,<sup>a</sup> Khalil A. Abboud,<sup>a</sup>  
Kirk S. Schanze,<sup>\*b</sup> Adam S. Veige,<sup>\*a</sup>

<sup>a</sup> University of Florida, Department of Chemistry, Center for Catalysis, P.O. Box 117200,  
Gainesville, FL, 32611.

<sup>b</sup> University of Texas at San Antonio, Department of Chemistry, One UTSA Circle, San  
Antonio, TX 78249.

Corresponding Author

\* E-mail: [veige@chem.ufl.edu](mailto:veige@chem.ufl.edu)

E-mail: [kirk.schanze@utsa.edu](mailto:kirk.schanze@utsa.edu)

# Table of Contents

|                                                                            |            |
|----------------------------------------------------------------------------|------------|
| <b>1. Syntheses, NMR, X-Ray Crystallography Data.....</b>                  | <b>S3</b>  |
| PPh <sub>3</sub> AuC≡CTh.....                                              | S3         |
| Au <sub>2</sub> -Th.....                                                   | S7         |
| PPh <sub>3</sub> AuC≡CPhNMe <sub>2</sub> .....                             | S11        |
| Au <sub>2</sub> -PhNMe <sub>2</sub> .....                                  | S15        |
| Au <sub>2</sub> -biTh.....                                                 | S19        |
| 4,5-Au <sub>1</sub> -Th .....                                              | S24        |
| <b>2. Fluorescence of Au<sub>2</sub>-Th and 4,5-Au<sub>1</sub>-Th.....</b> | <b>S29</b> |
| <b>3. Computational Results.....</b>                                       | <b>S30</b> |
| Validation of Trimethyl Phosphine Ligands.....                             | S30        |
| Calculated Absorption Spectra.....                                         | S31        |
| Full Disclosure.....                                                       | S36        |
| Orbital Analysis.....                                                      | S39        |
| Triplet States.....                                                        | S40        |
| <b>4. References.....</b>                                                  | <b>S41</b> |

## 1. Syntheses, NMR and X-ray Crystallography Data

### Synthesis of $\text{PPh}_3\text{AuC}\equiv\text{CTh}$ .

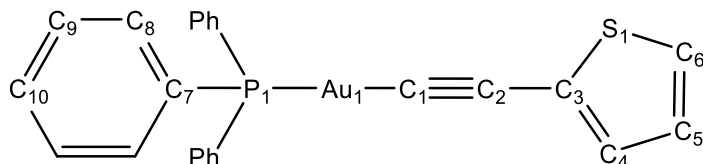

74.4 % Yield (0.37 mmol, 209.6 mg).  $^1\text{H}$  NMR (500 MHz,  $\text{CDCl}_3$ ):  $\delta$  6.89 (dd,  $^3J_{\text{HH}} = 3.5$ , 5.1 Hz, 1H,  $\text{C}_5\text{-H}$ ), 7.08 (dd,  $^3J_{\text{HH}} = 5.2$  Hz,  $^4J_{\text{HH}} = 1.2$  Hz, 1H,  $\text{C}_4\text{-H}$ ), 7.15 (dd,  $^3J_{\text{HH}} = 3.7$  Hz,  $^3J_{\text{HH}} = 1.3$  Hz, 1H,  $\text{C}_6\text{-H}$ ), 7.43-7.56 (m, 15H, aromatic).  $^{13}\text{C}\{^1\text{H}\}$  NMR (indirect detection through  $^1\text{H}$ - $^{13}\text{C}$  gHMBC and  $^1\text{H}$ - $^{13}\text{C}$  gHSQC (126 MHz,  $\text{CDCl}_3$ )):  $\delta$  125.1 ( $\text{C}_4$ ), 125.2 ( $\text{C}_3$ ), 126.5 ( $\text{C}_5$ ), 129.1 (d,  $^4J_{\text{CP}} = 11$  Hz,  $\text{C}_{10}$ ), 129.6 (d,  $^1J_{\text{CP}} = 56$  Hz,  $\text{C}_7$ ), 131.1 ( $\text{C}_6$ ), 131.5 (d,  $^3J_{\text{CP}} = 3$  Hz,  $\text{C}_9$ ), 134.3 (d,  $^2J_{\text{CP}} = 14$  Hz,  $\text{C}_8$ ).  $^{31}\text{P}\{^1\text{H}\}$  NMR (121 MHz,  $\text{CDCl}_3$ ):  $\delta$  42.52. ESI-MS:  $m/z$  calculated for  $\text{C}_{24}\text{H}_{18}\text{AuPS}$   $[\text{M}+\text{Na}]^+$  589.0430, found 589.0408. Anal. Calcd. for  $\text{C}_{24}\text{H}_{18}\text{AuPS}$ : C, 50.89; H, 3.20. Found: C, 50.60; H, 3.11; N, -0.23.

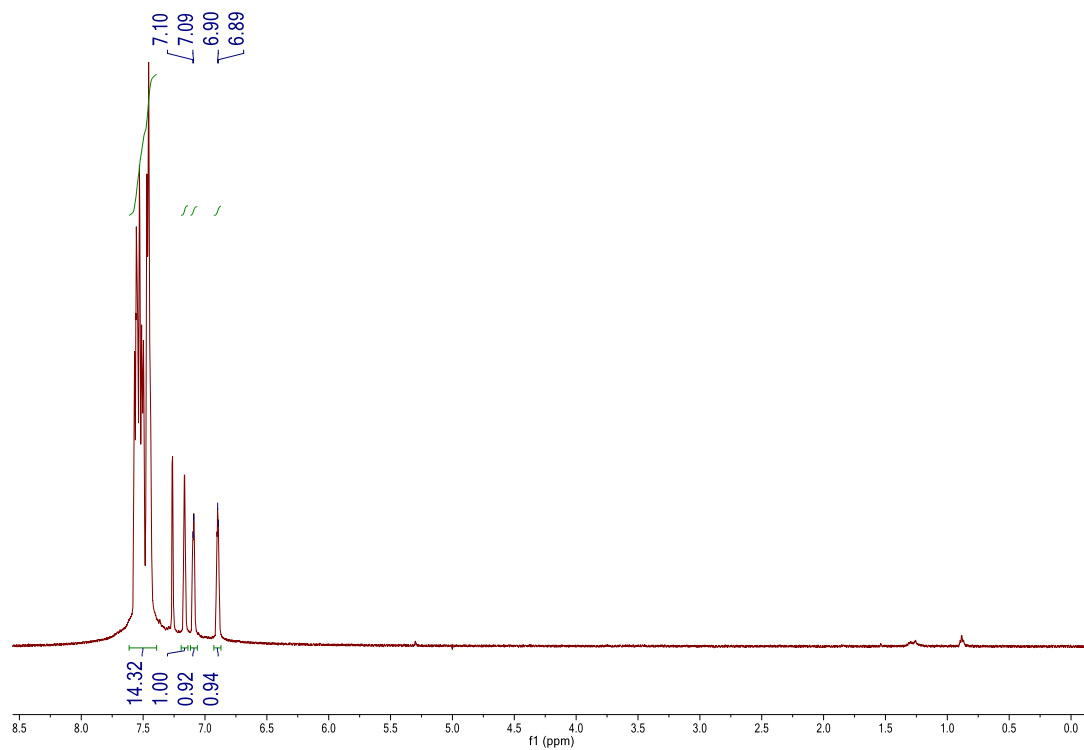

**Figure S1.** <sup>1</sup>H NMR spectrum of **PPh<sub>3</sub>AuC≡CTh** (CDCl<sub>3</sub>, 500 MHz, 25 °C).

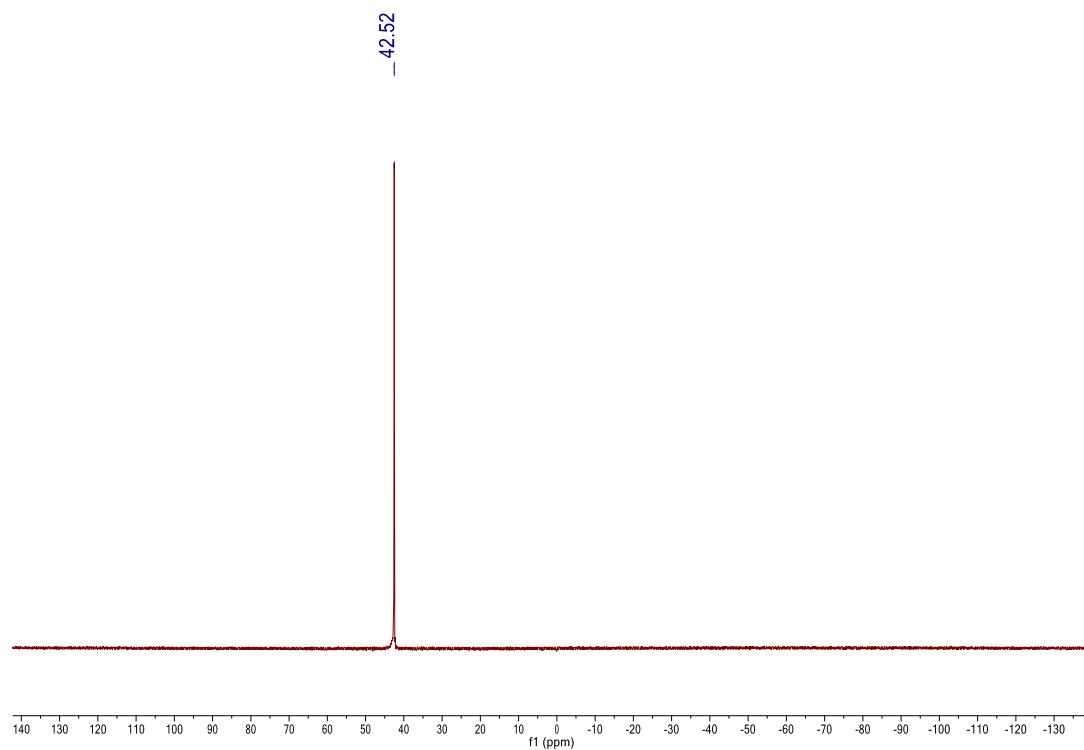

**Figure S2.** <sup>31</sup>P{<sup>1</sup>H} NMR spectrum of **PPh<sub>3</sub>AuC≡CTh** (CDCl<sub>3</sub>, 121 MHz, 25 °C).

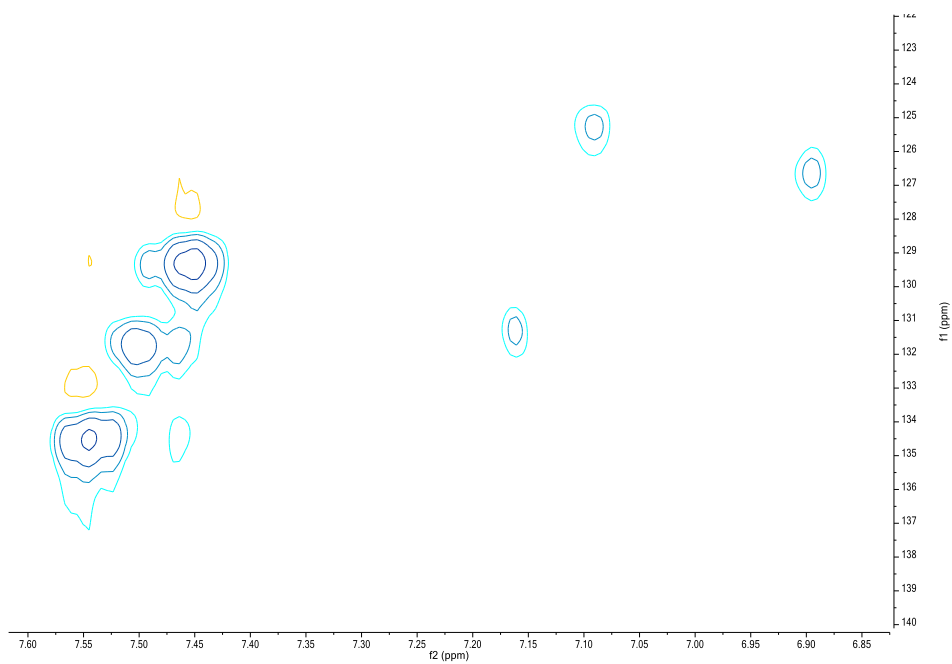

**Figure S3.**  $^1\text{H}$ - $^{13}\text{C}$  gHSQC spectrum of  **$\text{PPh}_3\text{AuC}\equiv\text{CTh}$**  ( $\text{CDCl}_3$ , 500 MHz, 25  $^\circ\text{C}$ ).

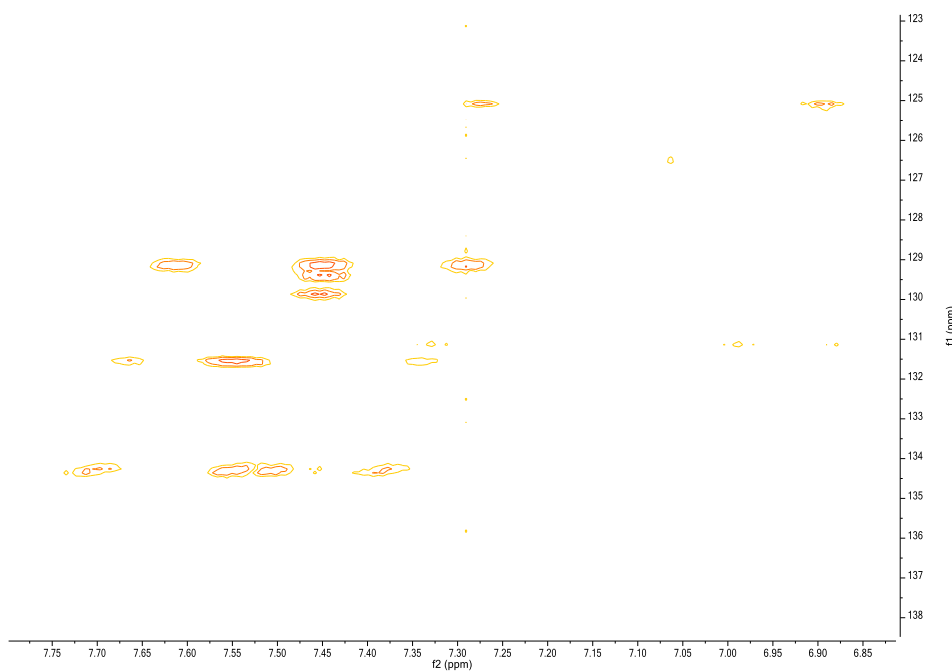

**Figure S4.**  $^1\text{H}$ - $^{13}\text{C}$  gHMBC spectrum of  **$\text{PPh}_3\text{AuC}\equiv\text{CTh}$**  ( $\text{CDCl}_3$ , 500 MHz, 25  $^\circ\text{C}$ ).

## X-Ray Crystallography of **PPh<sub>3</sub>AuC≡CTh**.

X-Ray Intensity data were collected at 100 K on a Bruker D8 Venture diffractometer using MoK $\alpha$  radiation ( $\lambda = 0.71073$  Å) and a Photon III area detector. Raw data frames were read by program SAINT<sup>6</sup> and integrated using 3D profiling algorithms. The resulting data were reduced to produce hkl reflections and their intensities and estimated standard deviations. The data were corrected for Lorentz and polarization effects and numerical absorption corrections were applied based on indexed and measured faces. The structure was solved and refined in *SHELXTL2014*, using full-matrix least-squares refinement. The non-H atoms were refined with anisotropic thermal parameters and all of the H atoms were calculated in idealized positions and refined riding on their parent atoms. One of the thiophene rings is disordered and refined in two parts. In the final cycle of refinement, 14010 reflections (of which 13274 are observed with  $I > 2 \sigma(I)$ ) were used to refine 488 parameters and the resulting  $R_1$ ,  $wR_2$  and  $S$  (goodness of fit) were 1.79%, 4.18% and 1.049, respectively. The refinement was carried out by minimizing the  $wR_2$  function using  $F^2$  rather than  $F$  values.  $R_1$  is calculated to provide a reference to the conventional  $R$  value but its function is not minimized.

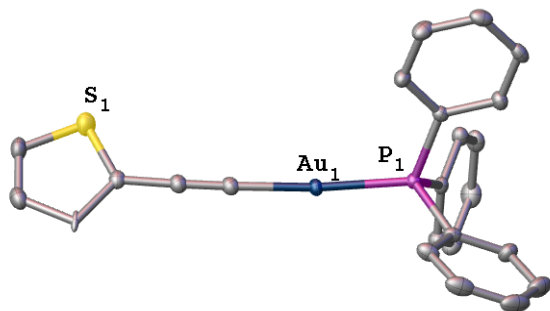

**Figure S5.** Molecular structure of **PPh<sub>3</sub>AuC≡CTh** (All hydrogen atoms removed for clarity).

**Table S1.** Crystal data and structure refinement for shen3.

|                        |                                                                               |                                                             |
|------------------------|-------------------------------------------------------------------------------|-------------------------------------------------------------|
| Identification code    | shen3                                                                         |                                                             |
| Empirical formula      | C <sub>48</sub> H <sub>36</sub> Au <sub>2</sub> P <sub>2</sub> S <sub>2</sub> |                                                             |
| Formula weight         | 1132.76                                                                       |                                                             |
| Temperature            | 100(2) K                                                                      |                                                             |
| Wavelength             | 0.71073 Å                                                                     |                                                             |
| Crystal system         | Triclinic                                                                     |                                                             |
| Space group            | P-1                                                                           |                                                             |
| Unit cell dimensions   | a = 11.4948(4) Å<br>b = 12.7123(5) Å<br>c = 13.9821(6) Å                      | a = 96.6190(10)°.<br>b = 93.3830(10)°.<br>c = 92.2090(10)°. |
| Volume                 | 2023.86(14) Å <sup>3</sup>                                                    |                                                             |
| Z                      | 2                                                                             |                                                             |
| Density (calculated)   | 1.859 Mg/m <sup>3</sup>                                                       |                                                             |
| Absorption coefficient | 7.457 mm <sup>-1</sup>                                                        |                                                             |
| F(000)                 | 1088                                                                          |                                                             |

|                                   |                                             |
|-----------------------------------|---------------------------------------------|
| Crystal size                      | 0.223 x 0.205 x 0.126 mm <sup>3</sup>       |
| Theta range for data collection   | 2.701 to 33.108°.                           |
| Index ranges                      | -17≤h≤17, -18≤k≤19, -20≤l≤21                |
| Reflections collected             | 117239                                      |
| Independent reflections           | 14010 [R(int) = 0.0226]                     |
| Completeness to theta = 25.000°   | 99.0 %                                      |
| Absorption correction             | Semi-empirical from equivalents             |
| Max. and min. transmission        | 0.5628 and 0.3433                           |
| Refinement method                 | Full-matrix least-squares on F <sup>2</sup> |
| Data / restraints / parameters    | 14010 / 18 / 488                            |
| Goodness-of-fit on F <sup>2</sup> | 1.049                                       |
| Final R indices [I>2sigma(I)]     | R1 = 0.0179, wR2 = 0.0418 [13274]           |
| R indices (all data)              | R1 = 0.0198, wR2 = 0.0427                   |
| Extinction coefficient            | n/a                                         |
| Largest diff. peak and hole       | 1.406 and -1.449 e.Å <sup>-3</sup>          |

## Synthesis of Au<sub>2</sub>-Th.

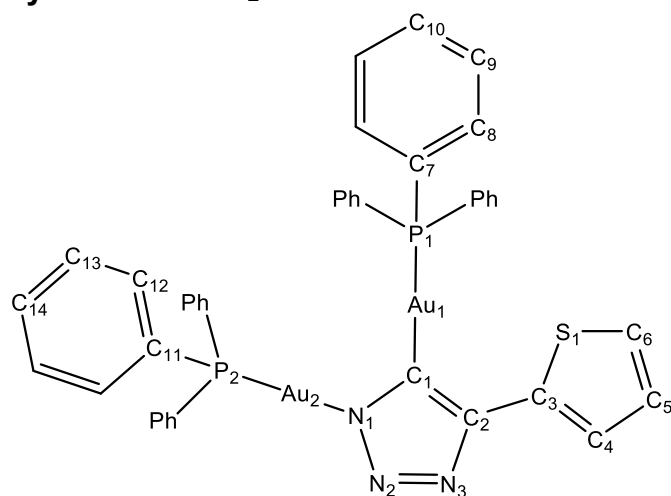

93.8% Yield (0.047 mmol, 50.1 mg). <sup>1</sup>H NMR (500 MHz, CDCl<sub>3</sub>): δ 6.85-6.90 (m, 2H, C<sub>5</sub>-H and C<sub>6</sub>-H), 7.12-7.21 (m, 12H, C<sub>9</sub>-H and C<sub>13</sub>-H), 7.28-7.30 (m, 6H, C<sub>10</sub>-H and C<sub>14</sub>-H), 7.38-7.43 (m, 12H, C<sub>8</sub>-H and C<sub>12</sub>-H), 7.60-7.62 (m, 1H, C<sub>4</sub>-H). <sup>13</sup>C{<sup>1</sup>H} NMR (indirect detection through <sup>1</sup>H-<sup>13</sup>C gHMBC and <sup>1</sup>H-<sup>13</sup>C gHSQC (126 MHz, CDCl<sub>3</sub>)): δ 120.7 (C<sub>4</sub>), 121.1 (C<sub>5</sub>), 127.1 (C<sub>6</sub>), 129.1 (d, <sup>3</sup>J<sub>CP</sub> = 11 Hz, C<sub>9</sub> and C<sub>13</sub>), 131.5 (d, <sup>4</sup>J<sub>CP</sub> = 12 Hz, C<sub>10</sub> and C<sub>14</sub>), 134.3 (d, <sup>2</sup>J<sub>CP</sub> = 14 Hz, C<sub>8</sub> and C<sub>12</sub>), 140.2 (C<sub>3</sub>). <sup>31</sup>P{<sup>1</sup>H} NMR (121 MHz, CDCl<sub>3</sub>): δ 44.59 (s, P1), 31.50 (s, P2). ESI-MS: m/z calculated for C<sub>42</sub>H<sub>33</sub>Au<sub>2</sub>N<sub>3</sub>P<sub>2</sub>S [M+H]<sup>+</sup> 1068.1280, found 1068.1252.

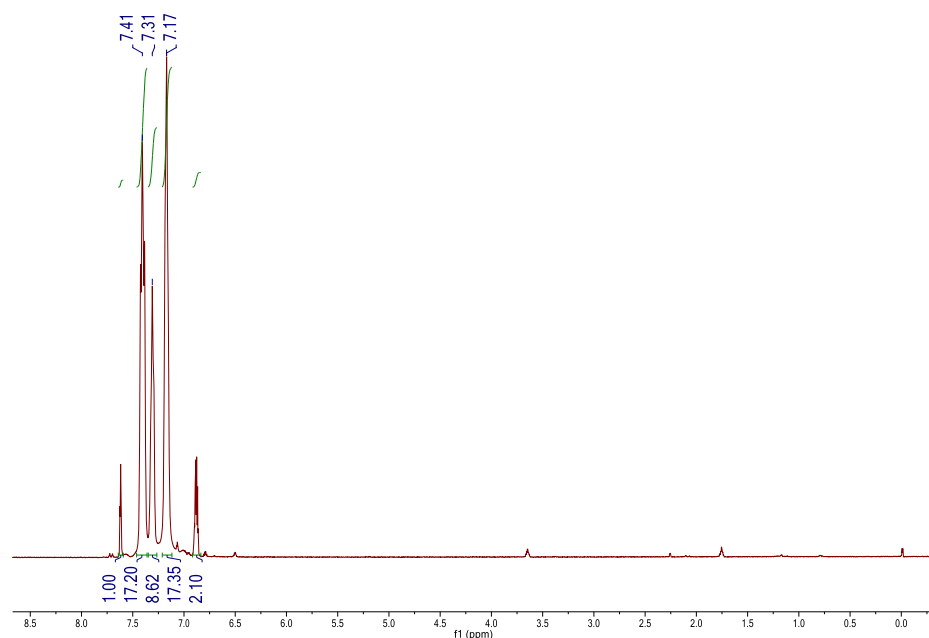

**Figure S6.** <sup>1</sup>H NMR spectrum of **Au<sub>2</sub>-Th** (CDCl<sub>3</sub>, 500 MHz, 25 °C).



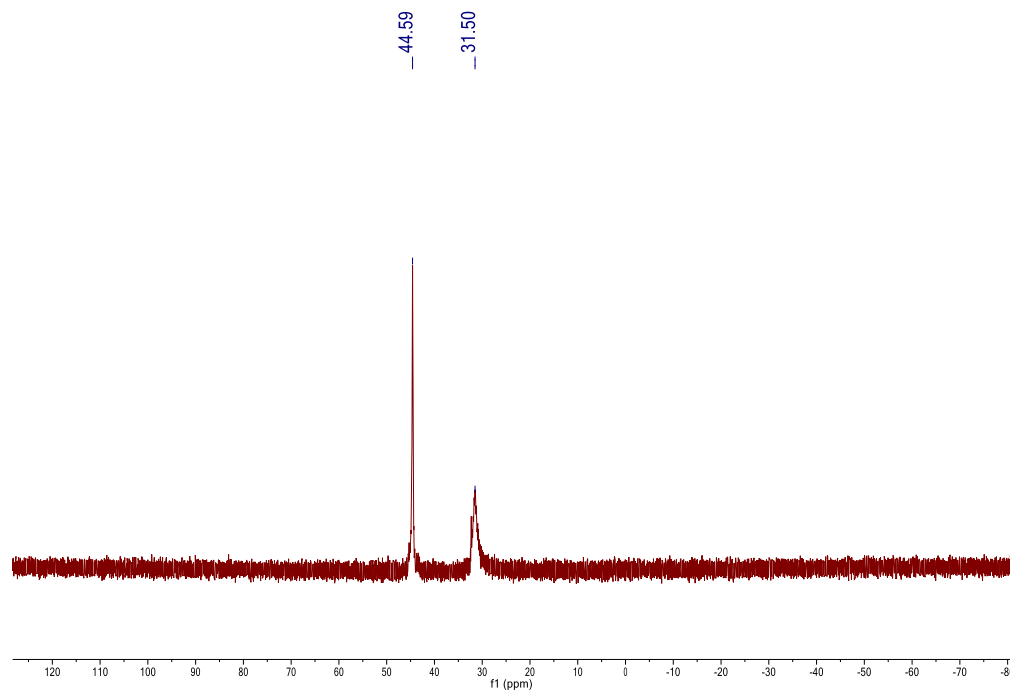

**Figure S7.**  $^{31}\text{P}\{^1\text{H}\}$  NMR spectrum of  $\text{Au}_2\text{-Th}$  ( $\text{CDCl}_3$ , 121 MHz, 25 °C).

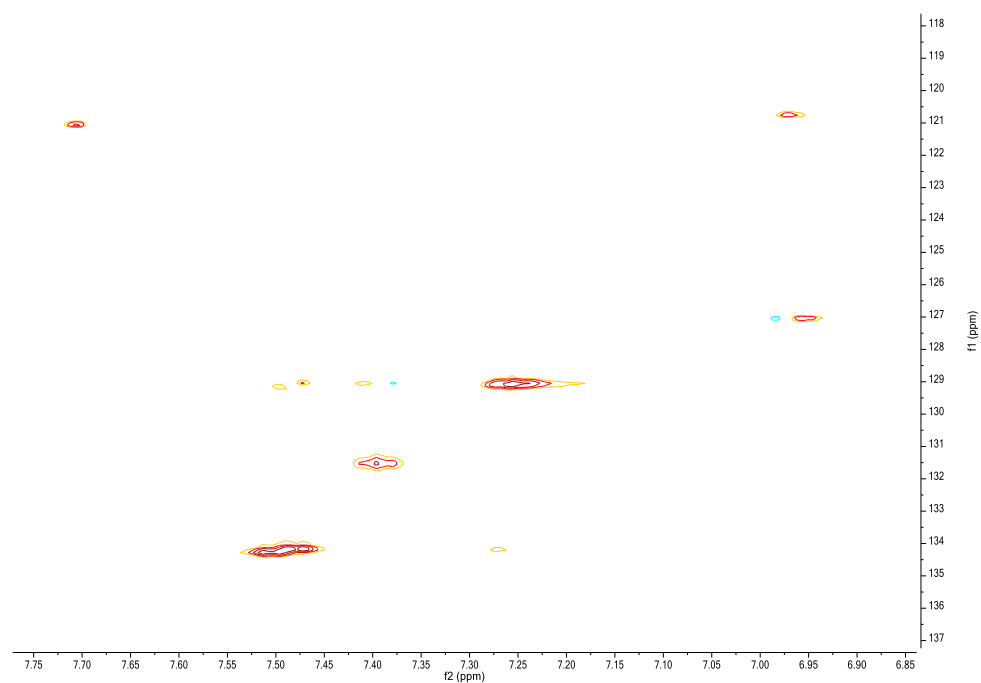

**Figure S8.**  $^1\text{H}\text{-}^{13}\text{C}$  gHSQC spectrum of  $\text{Au}_2\text{-Th}$  ( $\text{CDCl}_3$ , 500 MHz, 25 °C).

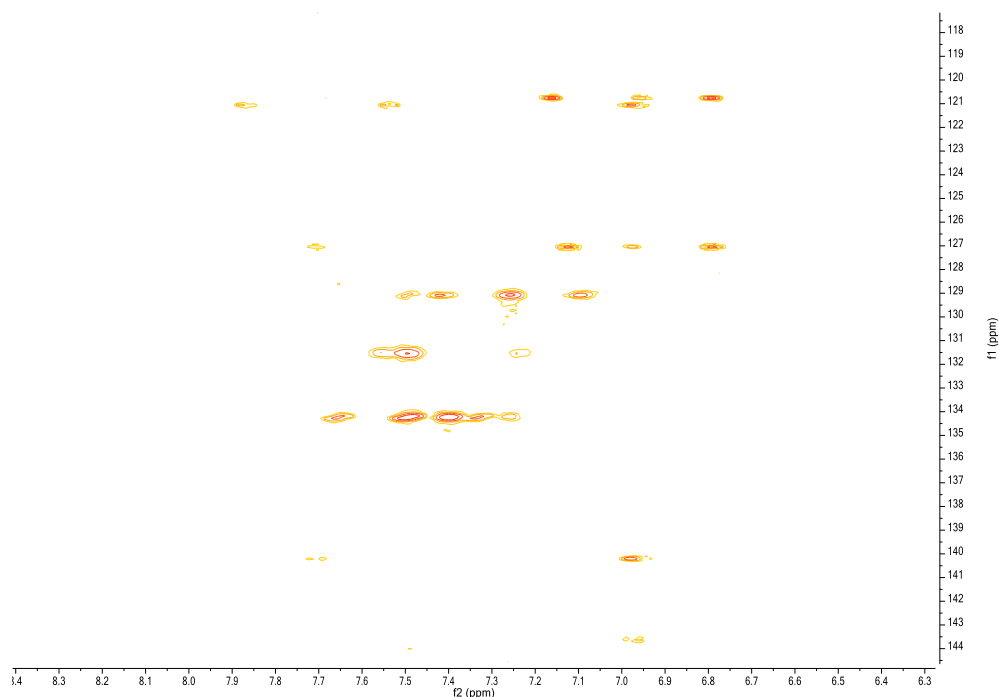

**Figure S9.**  $^1\text{H}$ - $^{13}\text{C}$  gHMBC spectrum of **Au<sub>2</sub>-Th** ( $\text{CDCl}_3$ , 500 MHz, 25 °C).

### X-Ray Crystallography of **Au<sub>2</sub>-Th**.

X-Ray Intensity data were collected at 100 K on a Bruker D8 Venture diffractometer using MoK $\alpha$  radiation ( $\lambda = 0.71073 \text{ \AA}$ ) and a Photon III area detector. Raw data frames were read by program SAINT<sup>6</sup> and integrated using 3D profiling algorithms. The resulting data were reduced to produce hkl reflections and their intensities and estimated standard deviations. The data were corrected for Lorentz and polarization effects and numerical absorption corrections were applied based on indexed and measured faces. The structure was solved and refined in *SHELXTL2014*, using full-matrix least-squares refinement. The non-H atoms were refined with anisotropic thermal parameters and all of the H atoms were calculated in idealized positions and refined riding on their parent atoms. The asymmetric unit consists of the digold complex and two dichloromethane solvent molecules. Each of the solvent molecules were disordered and refined in two parts. In the final cycle of refinement, 11561 reflections (of which 10035 are observed with  $I > 2\sigma(I)$ ) were used to refine 491 parameters and the resulting  $R_1$ ,  $wR_2$  and S (goodness of fit) were 3.77%, 9.33% and 1.067, respectively. The refinement was carried out by minimizing the  $wR_2$  function using  $F^2$  rather than  $F$  values.  $R_1$  is calculated to provide a reference to the conventional R value but its function is not minimized.

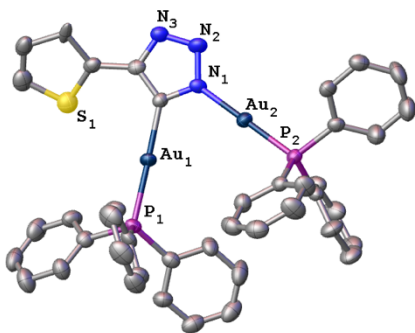

**Figure S10.** Molecular structure of **Au<sub>2</sub>-Th** (All hydrogen atoms removed for clarity).

**Table S2.** Crystal data and structure refinement for shen4.

|                                   |                                                                                                    |
|-----------------------------------|----------------------------------------------------------------------------------------------------|
| Identification code               | shen4                                                                                              |
| Empirical formula                 | C <sub>43.50</sub> H <sub>36</sub> Au <sub>2</sub> Cl <sub>3</sub> N <sub>3</sub> P <sub>2</sub> S |
| Formula weight                    | 1195.03                                                                                            |
| Temperature                       | 173(2) K                                                                                           |
| Wavelength                        | 0.71073 Å                                                                                          |
| Crystal system                    | Orthorhombic                                                                                       |
| Space group                       | P n a 21                                                                                           |
| Unit cell dimensions              | a = 17.4021(16) Å      a = 90°<br>b = 22.787(2) Å      b = 90°<br>c = 11.8185(10) Å      c = 90°   |
| Volume                            | 4686.6(8) Å <sup>3</sup>                                                                           |
| Z                                 | 4                                                                                                  |
| Density (calculated)              | 1.694 Mg/m <sup>3</sup>                                                                            |
| Absorption coefficient            | 6.569 mm <sup>-1</sup>                                                                             |
| F(000)                            | 2292                                                                                               |
| Crystal size                      | 0.11 x 0.03 x 0.02 mm <sup>3</sup>                                                                 |
| Theta range for data collection   | 2.267 to 28.309°.                                                                                  |
| Index ranges                      | -23 ≤ h ≤ 23, -30 ≤ k ≤ 30, -15 ≤ l ≤ 15                                                           |
| Reflections collected             | 55101                                                                                              |
| Independent reflections           | 11561 [R(int) = 0.0587]                                                                            |
| Completeness to theta = 25.242°   | 99.9 %                                                                                             |
| Absorption correction             | "multi-scan"                                                                                       |
| Max. and min. transmission        | 0.2907 and 0.2004                                                                                  |
| Refinement method                 | Full-matrix least-squares on F <sup>2</sup>                                                        |
| Data / restraints / parameters    | 11561 / 391 / 491                                                                                  |
| Goodness-of-fit on F <sup>2</sup> | 1.067                                                                                              |
| Final R indices [I > 2sigma(I)]   | R1 = 0.0377, wR2 = 0.0933 [10035]                                                                  |
| R indices (all data)              | R1 = 0.0488, wR2 = 0.0989                                                                          |
| Absolute structure parameter      | 0.020(4)                                                                                           |
| Extinction coefficient            | n/a                                                                                                |
| Largest diff. peak and hole       | 1.945 and -1.046 e.Å <sup>-3</sup>                                                                 |

## Synthesis of $\text{PPh}_3\text{AuC}\equiv\text{CPhNMe}_2$ .

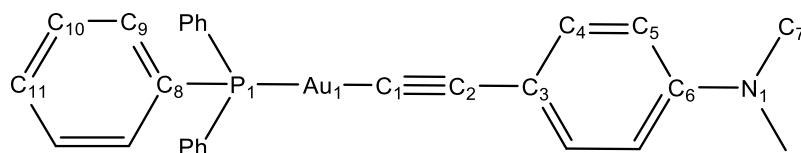

62.3 % Yield (0.31 mmol, 187.9 mg).  $^1\text{H}$  NMR (500 MHz,  $\text{CDCl}_3$ ):  $\delta$  2.91 (s, 6H,  $\text{C}_7\text{-H}$ ), 6.57 (d,  $^3J_{\text{HH}} = 8.4$  Hz, 2H,  $\text{C}_5\text{-H}$ ), 7.35-7.55 (m, 17H,  $\text{C}_4\text{-H}$  and aromatic).  $^{13}\text{C}\{^1\text{H}\}$  NMR (indirect detection through  $^1\text{H}\text{-}^{13}\text{C}$  gHMBC and  $^1\text{H}\text{-}^{13}\text{C}$  gHSQC (126 MHz,  $\text{CDCl}_3$ )):  $\delta$  40.3 ( $\text{C}_7$ ), 111.8 ( $\text{C}_5$ ), 112.1 ( $\text{C}_3$ ), 129.1 (d,  $^4J_{\text{CP}} = 11$  Hz,  $\text{C}_{11}$ ), 130.0 (d,  $^1J_{\text{CP}} = 55$  Hz,  $\text{C}_8$ ), 131.4 (d,  $^3J_{\text{CP}} = 2$  Hz,  $\text{C}_{10}$ ), 133.4 ( $\text{C}_4$ ), 134.3 (d,  $^2J_{\text{CP}} = 14$  Hz,  $\text{C}_9$ ), 149.2 ( $\text{C}_6$ ).  $^{31}\text{P}\{^1\text{H}\}$  NMR (121 MHz,  $\text{CDCl}_3$ ):  $\delta$  42.52. ESI-MS:  $m/z$  calculated for  $\text{C}_{28}\text{H}_{25}\text{AuNP}$   $[\text{M}+\text{H}]^+$  604.1468, found 604.1438.

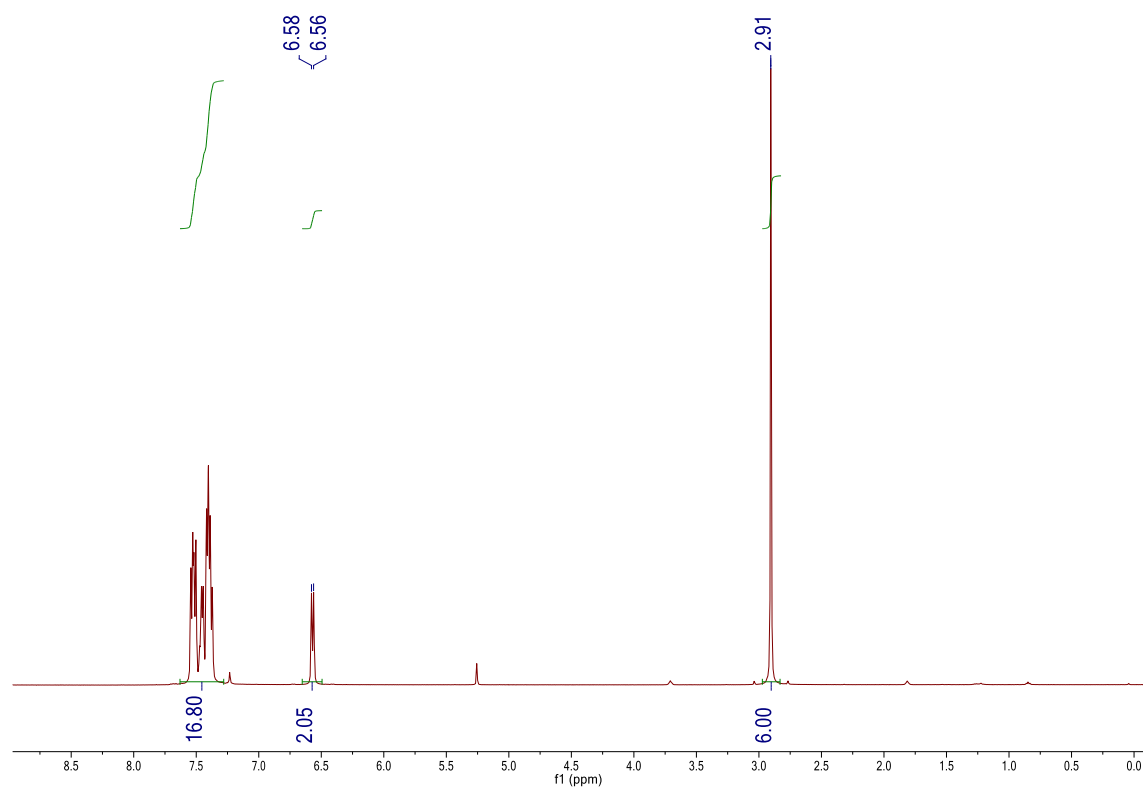

**Figure S11.**  $^1\text{H}$  NMR spectrum of  $\text{PPh}_3\text{AuC}\equiv\text{CPhNMe}_2$  ( $\text{CDCl}_3$ , 500 MHz, 25 °C).

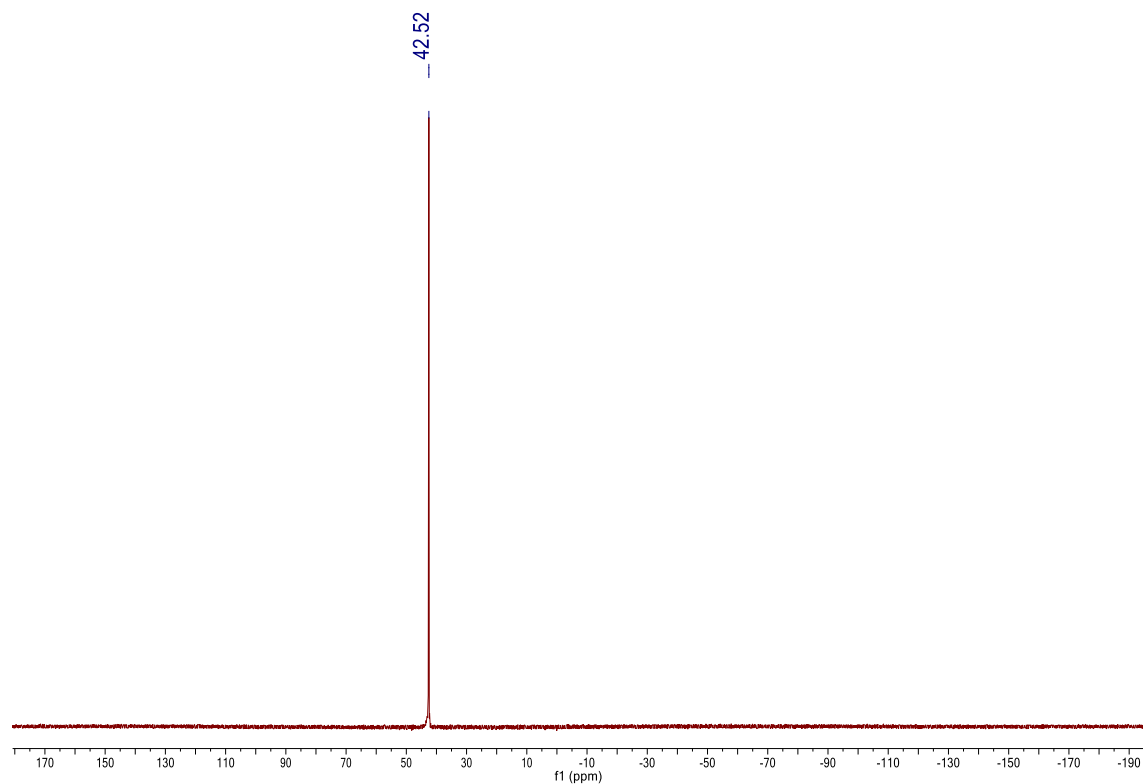

**Figure S12.**  $^{31}\text{P}\{^1\text{H}\}$  NMR spectrum of  $\text{PPh}_3\text{AuC}\equiv\text{CPhNMe}_2$  ( $\text{CDCl}_3$ , 121 MHz, 25 °C).

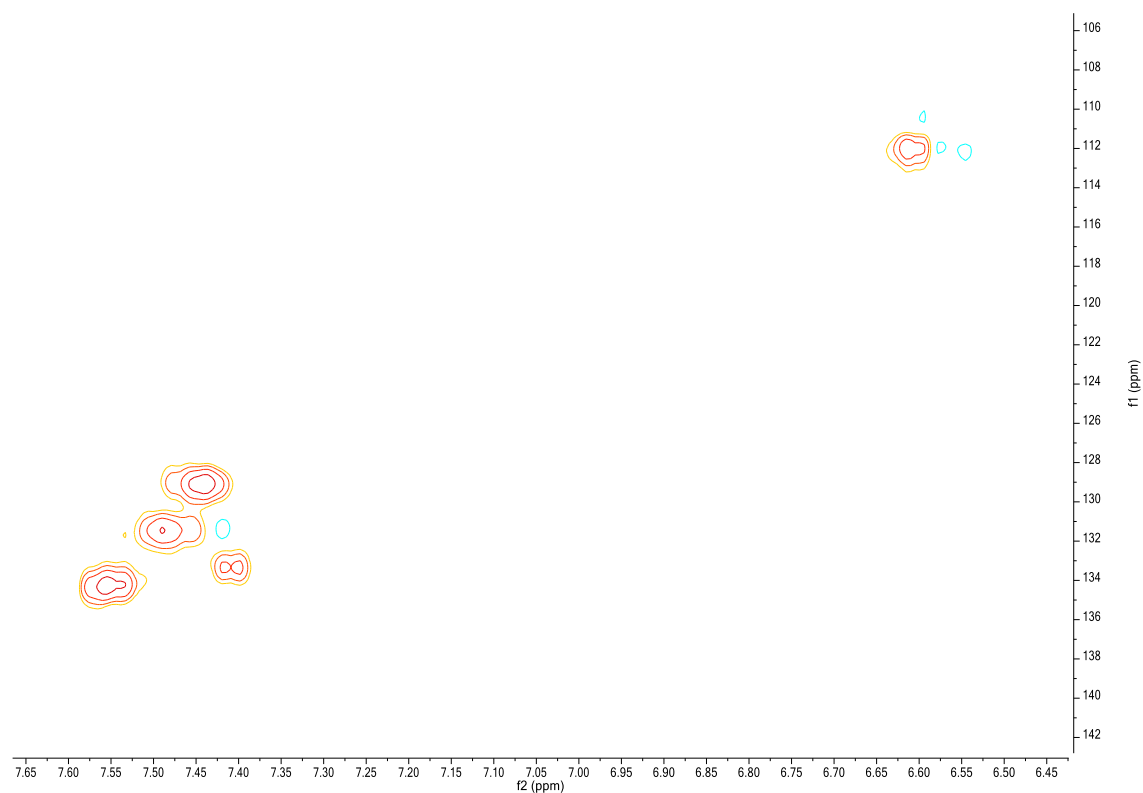

**Figure S13.**  $^1\text{H}$ - $^{13}\text{C}$  gHSQC spectrum of  $\text{PPh}_3\text{AuC}\equiv\text{CPhNMe}_2$  ( $\text{CDCl}_3$ , 500 MHz, 25 °C).

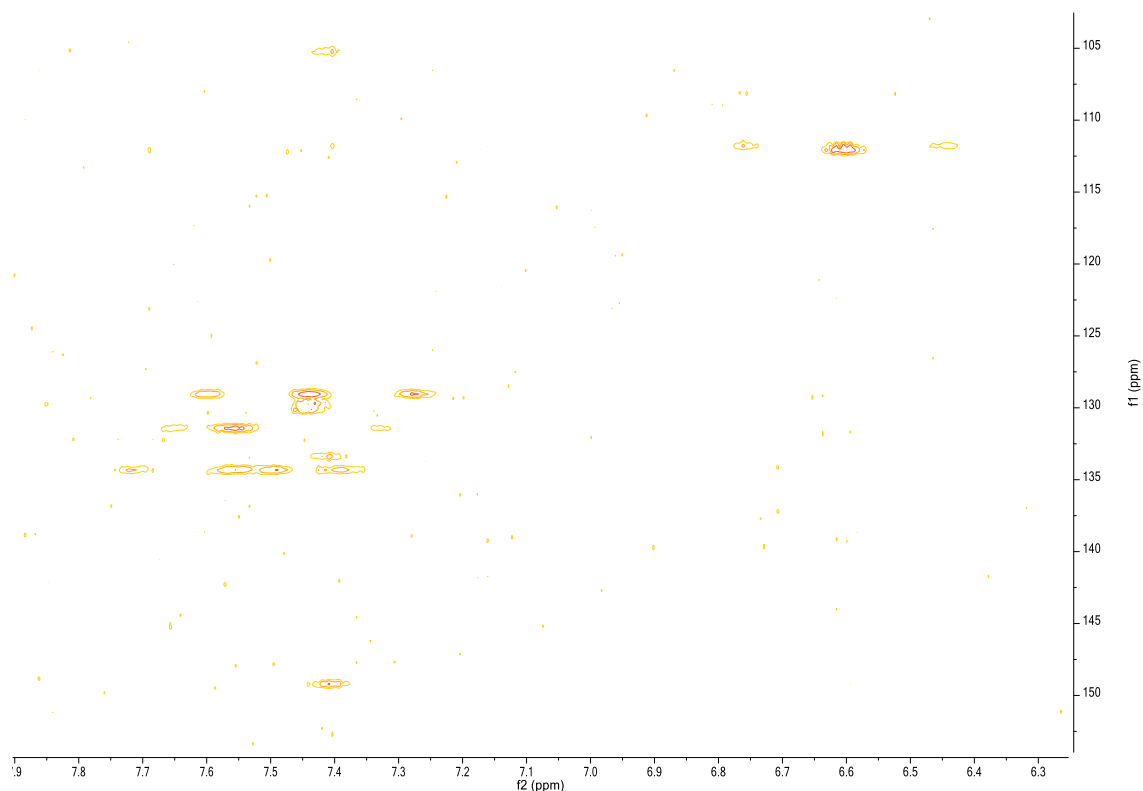

**Figure S14.**  $^1\text{H}$ - $^{13}\text{C}$  gHMBC spectrum of  $\text{PPh}_3\text{AuC}\equiv\text{CPhNMe}_2$  ( $\text{CDCl}_3$ , 500 MHz, 25 °C).

#### X-Ray Crystallography of $\text{PPh}_3\text{AuC}\equiv\text{CPhNMe}_2$ .

X-Ray Intensity data were collected at 100 K on a Bruker DV8 Venture diffractometer using  $\text{MoK}\alpha$  radiation ( $\lambda = 0.71073 \text{ \AA}$ ) and a Photon III area detector. Raw data frames were read by program SAINT<sup>6</sup> and integrated using 3D profiling algorithms. The resulting data were reduced to produce hkl reflections and their intensities and estimated standard deviations. The data were corrected for Lorentz and polarization effects and numerical absorption corrections were applied based on indexed and measured faces. The structure was solved and refined in *SHELXTL2014*, using full-matrix least-squares refinement. The non-H atoms were refined with anisotropic thermal parameters and all of the H atoms were calculated in idealized positions and refined riding on their parent atoms. The asymmetric unit consists of the Au complex and a THF solvent molecule refined at 50% occupancy. In the final cycle of refinement, 8961 reflections (of which 8821 are observed with  $I > 2\sigma(I)$ ) were used to refine 327 parameters and the resulting  $R_1$ ,  $wR_2$  and S (goodness of fit) were 1.49%, 3.43% and 1.132, respectively. The refinement was carried out by minimizing the  $wR_2$  function using  $F^2$  rather than  $F$  values.  $R_1$  is calculated to provide a reference to the conventional R value but its function is not minimized.

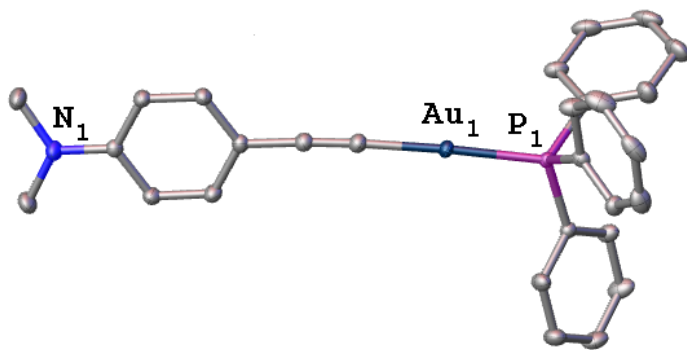

**Figure S15.** Molecular structure of **PPh<sub>3</sub>AuC≡CPhNMe<sub>2</sub>** (All hydrogen atoms removed for clarity).

**Table S3.** Crystal data and structure refinement for shen1.

|                                   |                                                                                                |                   |
|-----------------------------------|------------------------------------------------------------------------------------------------|-------------------|
| Identification code               | shen1                                                                                          |                   |
| Empirical formula                 | C <sub>30</sub> H <sub>29</sub> Au <sub>1</sub> N <sub>1</sub> O <sub>0.5</sub> P <sub>1</sub> |                   |
| Formula weight                    | 1278.95                                                                                        |                   |
| Temperature                       | 100(2) K                                                                                       |                   |
| Wavelength                        | 0.71073 Å                                                                                      |                   |
| Crystal system                    | Triclinic                                                                                      |                   |
| Space group                       | P -1                                                                                           |                   |
| Unit cell dimensions              | a = 9.1947(4) Å                                                                                | a = 68.8680(10)°. |
|                                   | b = 12.5315(5) Å                                                                               | b = 72.2030(10)°. |
|                                   | c = 12.6998(5) Å                                                                               | c = 72.2960(10)°. |
| Volume                            | 1268.24(9) Å <sup>3</sup>                                                                      |                   |
| Z                                 | 2                                                                                              |                   |
| Density (calculated)              | 1.675 Mg/m <sup>3</sup>                                                                        |                   |
| Absorption coefficient            | 5.884 mm <sup>-1</sup>                                                                         |                   |
| F(000)                            | 628                                                                                            |                   |
| Crystal size                      | 0.106 x 0.096 x 0.091 mm <sup>3</sup>                                                          |                   |
| Theta range for data collection   | 2.384 to 33.403°.                                                                              |                   |
| Index ranges                      | -14 ≤ h ≤ 13, -18 ≤ k ≤ 19, -19 ≤ l ≤ 19                                                       |                   |
| Reflections collected             | 76385                                                                                          |                   |
| Independent reflections           | 8961 [R(int) = 0.0276]                                                                         |                   |
| Completeness to theta = 25.000°   | 97.1 %                                                                                         |                   |
| Absorption correction             | Integration                                                                                    |                   |
| Max. and min. transmission        | 0.6119 and 0.4821                                                                              |                   |
| Refinement method                 | Full-matrix least-squares on F <sup>2</sup>                                                    |                   |
| Data / restraints / parameters    | 8961 / 0 / 327                                                                                 |                   |
| Goodness-of-fit on F <sup>2</sup> | 1.132                                                                                          |                   |
| Final R indices [I > 2sigma(I)]   | R1 = 0.0149, wR2 = 0.0343 [8821]                                                               |                   |
| R indices (all data)              | R1 = 0.0153, wR2 = 0.0344                                                                      |                   |
| Extinction coefficient            | n/a                                                                                            |                   |
| Largest diff. peak and hole       | 0.980 and -0.857 e.Å <sup>-3</sup>                                                             |                   |

## Synthesis of Au<sub>2</sub>-PhNMe<sub>2</sub>.

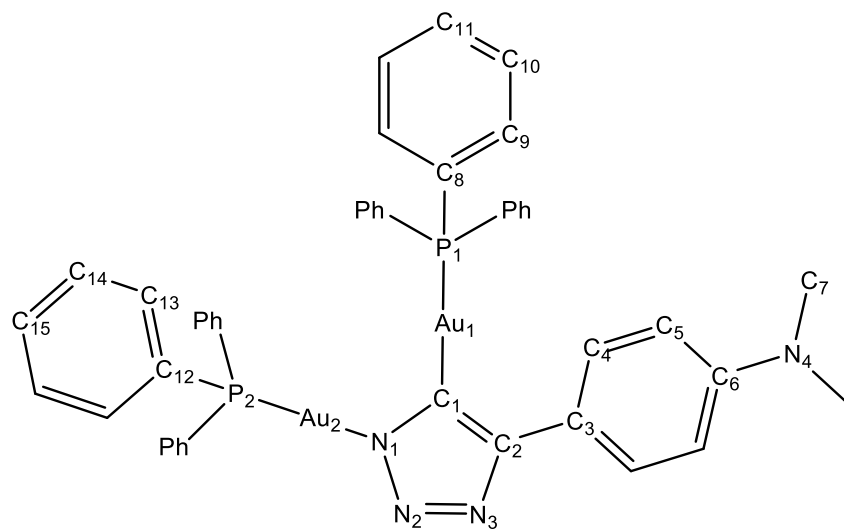

92.5 % Yield (0.046 mmol, 51.1 mg). <sup>1</sup>H NMR (500 MHz, CDCl<sub>3</sub>): δ 2.89 (s, 6H, C<sub>7</sub>-H), 6.69 (d, <sup>3</sup>J<sub>HH</sub> = 8.3 Hz, 2H, C<sub>5</sub>-H), 7.18-7.21 (m, 12H, C<sub>10</sub>-H and C<sub>14</sub>-H), 7.33-7.35 (m, 6H, C<sub>11</sub>-H and C<sub>15</sub>-H), 7.43-7.47 (m, 12H, C<sub>9</sub>-H and C<sub>13</sub>-H), 8.24 (d, <sup>3</sup>J<sub>HH</sub> = 8.2 Hz, 2H, C<sub>4</sub>-H). <sup>1</sup>C{<sup>1</sup>H} NMR (indirect detection through <sup>1</sup>H-<sup>13</sup>C gHMBC and <sup>1</sup>H-<sup>13</sup>C gHSQC (126 MHz, CDCl<sub>3</sub>)): δ 41.0 (C<sub>7</sub>), 112.8 (C<sub>5</sub>), 126.1 (C<sub>3</sub>), 127.3 (C<sub>4</sub>), 129.0 (d, <sup>3</sup>J<sub>CP</sub> = 11 Hz, C<sub>10</sub> and C<sub>14</sub>), 131.4 (C<sub>11</sub> and C<sub>15</sub>), 134.2 (d, <sup>2</sup>J<sub>CP</sub> = 14 Hz, C<sub>9</sub> and C<sub>13</sub>), 136.5 (C<sub>8</sub> and C<sub>12</sub>), 149.2 (C<sub>6</sub>), 151.7 (C<sub>2</sub>). <sup>31</sup>P{<sup>1</sup>H} NMR (121 MHz, CDCl<sub>3</sub>): δ 44.61 (s, P1), 31.17 (s, P2). ESI-MS: m/z calculated for C<sub>46</sub>H<sub>40</sub>Au<sub>2</sub>N<sub>4</sub>P<sub>2</sub> [M+H]<sup>+</sup> 1105.2138, found 1105.2104.

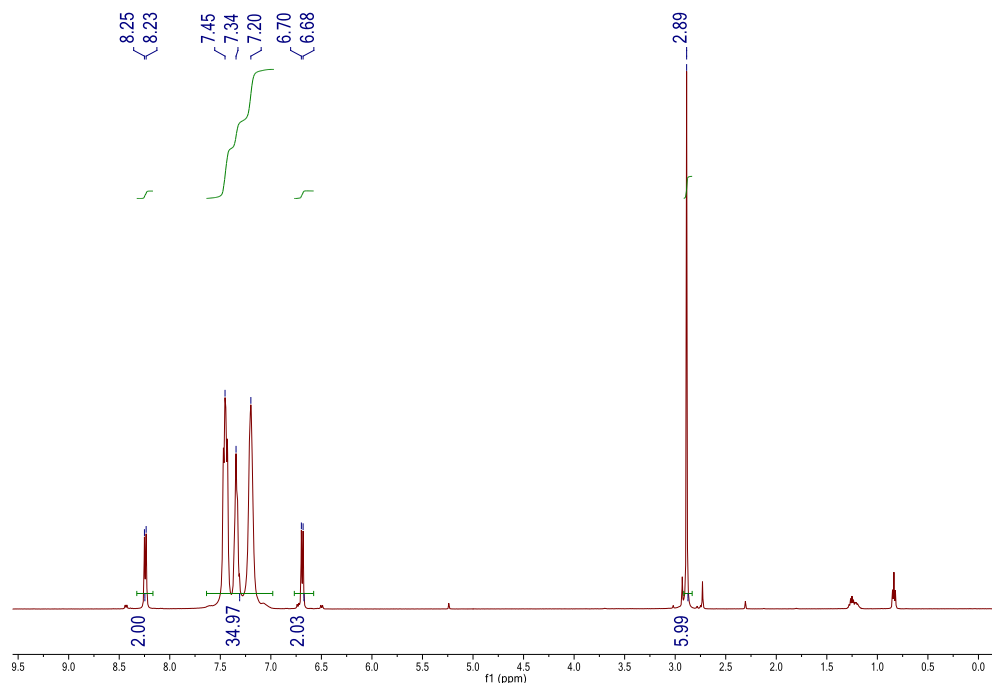

**Figure S16.** <sup>1</sup>H NMR spectrum of Au<sub>2</sub>-PhNMe<sub>2</sub> (CDCl<sub>3</sub>, 500 MHz, 25 °C).



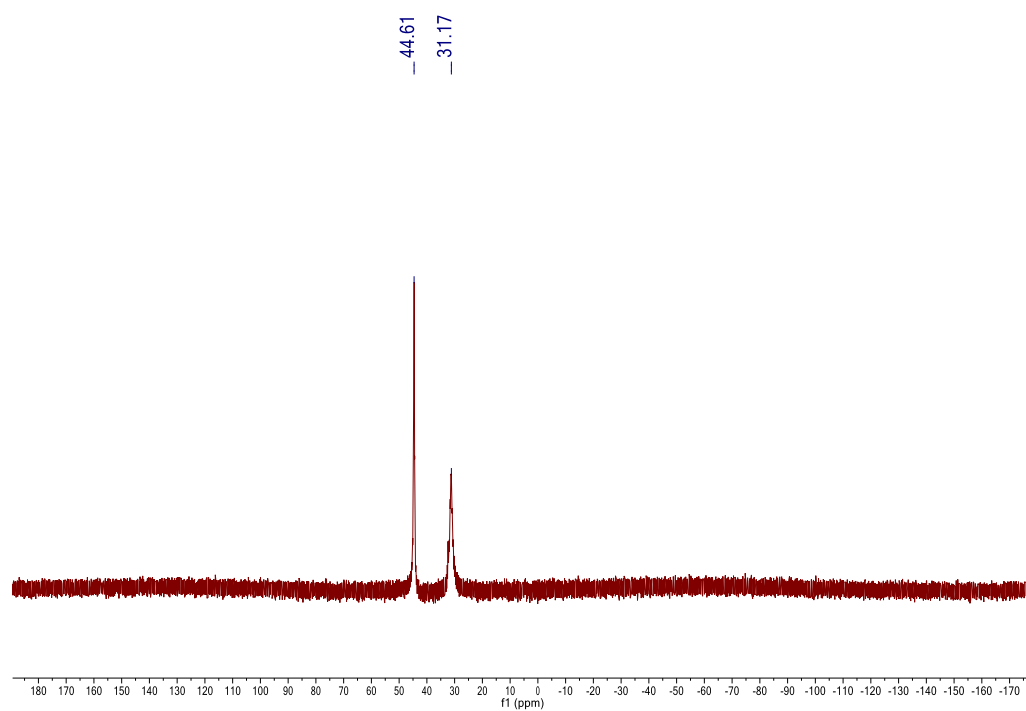

**Figure S17.**  $^{31}\text{P}\{^1\text{H}\}$  NMR spectrum of **Au<sub>2</sub>-PhNMe<sub>2</sub>** ( $\text{CDCl}_3$ , 121 MHz, 25 °C).

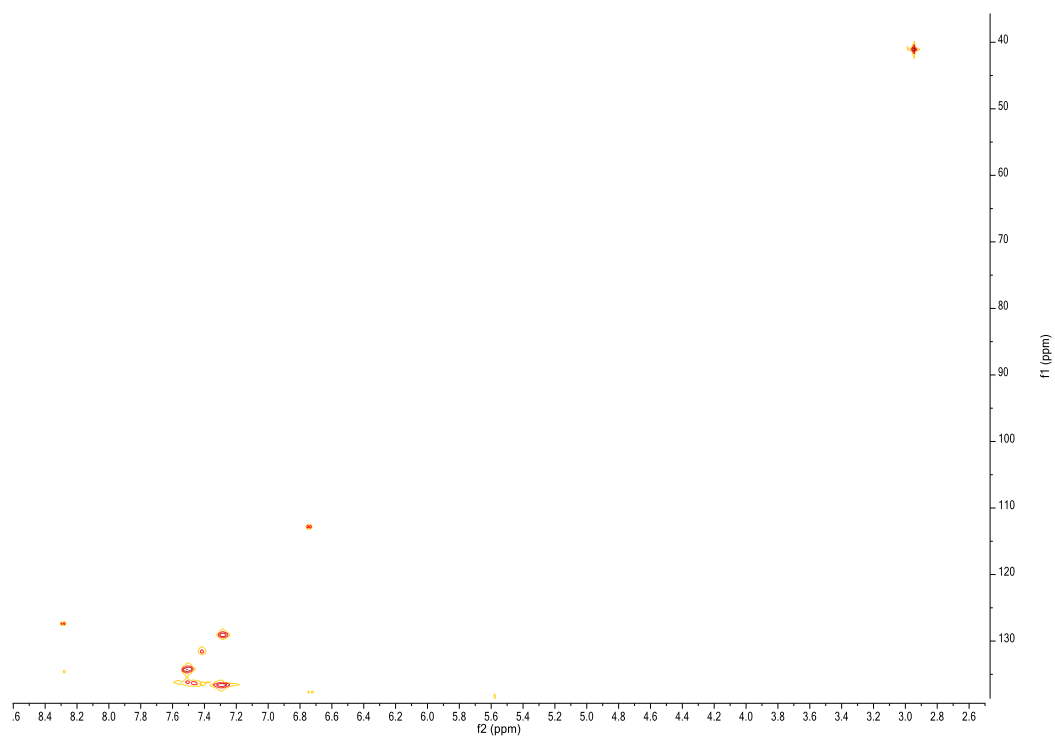

**Figure S18.**  $^1\text{H}$ - $^{13}\text{C}$  gHSQC spectrum of **Au<sub>2</sub>-PhNMe<sub>2</sub>** ( $\text{CDCl}_3$ , 500 MHz, 25 °C).

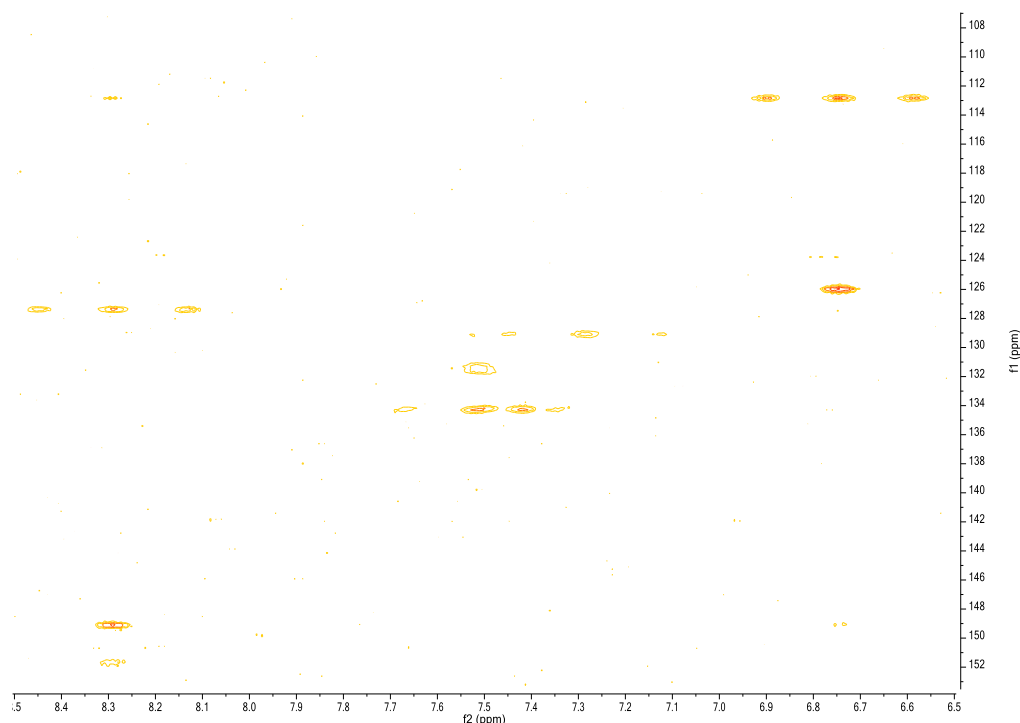

**Figure S19.**  $^1\text{H}$ - $^{13}\text{C}$  gHMBC spectrum of **Au<sub>2</sub>-PhNMe<sub>2</sub>** ( $\text{CDCl}_3$ , 500 MHz, 25 °C).

#### X-Ray Crystallography of **Au<sub>2</sub>-PhNMe<sub>2</sub>**.

X-Ray Intensity data were collected at 100 K on a Bruker DV8 Venture diffractometer using MoK $\alpha$  radiation ( $\lambda = 0.71073 \text{ \AA}$ ) and a Photon III area detector. Raw data frames were read by program SAINT<sup>6</sup> and integrated using 3D profiling algorithms. The resulting data were reduced to produce hkl reflections and their intensities and estimated standard deviations. The data were corrected for Lorentz and polarization effects and numerical absorption corrections were applied based on indexed and measured faces. The structure was solved and refined in *SHELXTL2014*, using full-matrix least-squares refinement. The non-H atoms were refined with anisotropic thermal parameters and all of the H atoms were calculated in idealized positions and refined riding on their parent atoms. The asymmetric unit consists of the gold complex and three dichloromethane molecules. The solvent molecules were disordered and could not be modeled properly, thus program SQUEEZE, a part of the PLATON package of crystallographic software, was used to calculate the solvent disorder area and remove its contribution to the overall intensity data. In the final cycle of refinement, 10827 reflections (of which 10235 are observed with  $I > 2\sigma(I)$ ) were used to refine 489 parameters and the resulting  $R_1$ ,  $wR_2$  and  $S$  (goodness of fit) were 2.69%, 6.51% and 1.080, respectively. The refinement was carried out by minimizing the  $wR_2$  function using  $F^2$  rather than  $F$  values.  $R_1$  is calculated to provide a reference to the conventional  $R$  value but its function is not minimized. The structure was solved and refined in *SHELXTL6.1*, using full-matrix least-squares refinement.

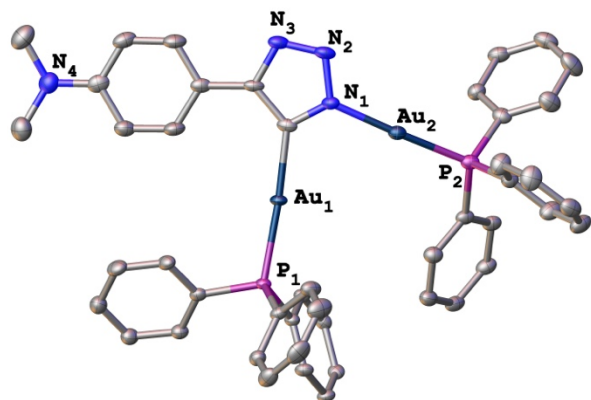

**Figure S20.** Molecular structure of **PPh<sub>3</sub>AuC≡CPhNMe<sub>2</sub>** (All hydrogen atoms removed for clarity).

**Table S4.** Crystal data and structure refinement for shen2.

|                                   |                                                                                               |                    |
|-----------------------------------|-----------------------------------------------------------------------------------------------|--------------------|
| Identification code               | shen2                                                                                         |                    |
| Empirical formula                 | C <sub>49</sub> H <sub>46</sub> Au <sub>2</sub> Cl <sub>6</sub> N <sub>4</sub> P <sub>2</sub> |                    |
| Formula weight                    | 1359.47                                                                                       |                    |
| Temperature                       | 293(2) K                                                                                      |                    |
| Wavelength                        | 0.71073 Å                                                                                     |                    |
| Crystal system                    | Triclinic                                                                                     |                    |
| Space group                       | P -1                                                                                          |                    |
| Unit cell dimensions              | a = 11.3232(5) Å                                                                              | a = 108.3241(13)°. |
|                                   | b = 14.8436(6) Å                                                                              | b = 110.0928(11)°. |
|                                   | c = 15.9362(7) Å                                                                              | c = 91.3270(13)°.  |
| Volume                            | 2361.95(18) Å <sup>3</sup>                                                                    |                    |
| Z                                 | 2                                                                                             |                    |
| Density (calculated)              | 1.912 Mg/m <sup>3</sup>                                                                       |                    |
| Absorption coefficient            | 6.652 mm <sup>-1</sup>                                                                        |                    |
| F(000)                            | 1316                                                                                          |                    |
| Crystal size                      | 0.319 x 0.193 x 0.103 mm <sup>3</sup>                                                         |                    |
| Theta range for data collection   | 2.300 to 27.499°.                                                                             |                    |
| Index ranges                      | -14 ≤ h ≤ 14, -19 ≤ k ≤ 19, -20 ≤ l ≤ 20                                                      |                    |
| Reflections collected             | 138984                                                                                        |                    |
| Independent reflections           | 10827 [R(int) = 0.0276]                                                                       |                    |
| Completeness to theta = 25.000°   | 99.6 %                                                                                        |                    |
| Absorption correction             | None                                                                                          |                    |
| Refinement method                 | Full-matrix least-squares on F <sup>2</sup>                                                   |                    |
| Data / restraints / parameters    | 10827 / 0 / 489                                                                               |                    |
| Goodness-of-fit on F <sup>2</sup> | 1.080                                                                                         |                    |
| Final R indices [I > 2σ(I)]       | R1 = 0.0269, wR2 = 0.0651 [10235]                                                             |                    |
| R indices (all data)              | R1 = 0.0290, wR2 = 0.0673                                                                     |                    |
| Extinction coefficient            | n/a                                                                                           |                    |
| Largest diff. peak and hole       | 4.799 and -1.861 e.Å <sup>-3</sup>                                                            |                    |

## Synthesis of Au<sub>2</sub>-biTh.

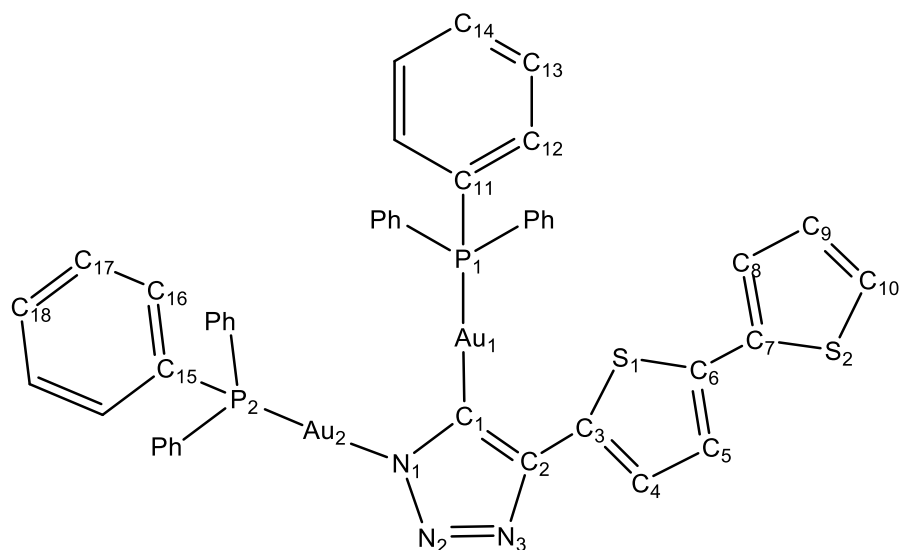

95.3% Yield (0.089 mmol, 102 mg). <sup>1</sup>H-NMR (600MHz, CDCl<sub>3</sub>), δ (ppm): 6.91 (dd, <sup>3</sup>J<sub>HH</sub> = 3.5 Hz, <sup>4</sup>J<sub>HH</sub> = 1.0 Hz, 1H, C<sub>8</sub>-H), 6.95 (dd, <sup>3</sup>J<sub>HH</sub> = 3.6, 5.0 Hz, 1H, C<sub>9</sub>-H), 7.09 (d, <sup>3</sup>J<sub>HH</sub> = 3.7 Hz, 1H, C<sub>5</sub>-H), 7.12 (d, <sup>3</sup>J<sub>HH</sub> = 4.8 Hz, 1H, C<sub>10</sub>-H), 7.24-7.38 (m, 12H, C<sub>13</sub>-H and C<sub>17</sub>-H), 7.40-7.49 (m, 6H, C<sub>14</sub>-H and C<sub>18</sub>-H), 7.48-7.60 (m, 12H, C<sub>12</sub>-H and C<sub>16</sub>-H), 7.61 (d, <sup>3</sup>J<sub>HH</sub> = 3.7 Hz, 1H, C<sub>4</sub>-H). <sup>13</sup>C{<sup>1</sup>H} NMR (indirect detection through <sup>1</sup>H-<sup>13</sup>C gHMBC and <sup>1</sup>H-<sup>13</sup>C gHSQC) (600 MHz, CDCl<sub>3</sub>), δ (ppm): 121.78 (C<sub>4</sub>), 122.42 (C<sub>8</sub>), 122.94 (C<sub>10</sub>), 124.25 (C<sub>5</sub>), 127.41 (C<sub>9</sub>), 128.48 (d, <sup>1</sup>J<sub>CP</sub> = 12 Hz, C<sub>11</sub> and C<sub>15</sub>), 129.12 (d, <sup>3</sup>J<sub>CP</sub> = 11 Hz, C<sub>13</sub> and C<sub>17</sub>), 131.56 (m, C<sub>14</sub> and C<sub>18</sub>), 132.07 (C<sub>6</sub>), 134.25 (d, <sup>2</sup>J<sub>CP</sub> = 14 Hz, C<sub>12</sub> and C<sub>16</sub>), 138.80 (C<sub>7</sub>), 145.56 (C<sub>2</sub>). <sup>31</sup>P{<sup>1</sup>H} NMR (242.9 MHz, CDCl<sub>3</sub>), δ (ppm): 44.58 (s, P<sub>1</sub>), 31.18 (s, P<sub>2</sub>). ESI-MS: m/z calculated for C<sub>46</sub>H<sub>35</sub>Au<sub>2</sub>N<sub>3</sub>P<sub>2</sub>S<sub>2</sub> [M+H]<sup>+</sup> 1150.1157, found 1150.1122.

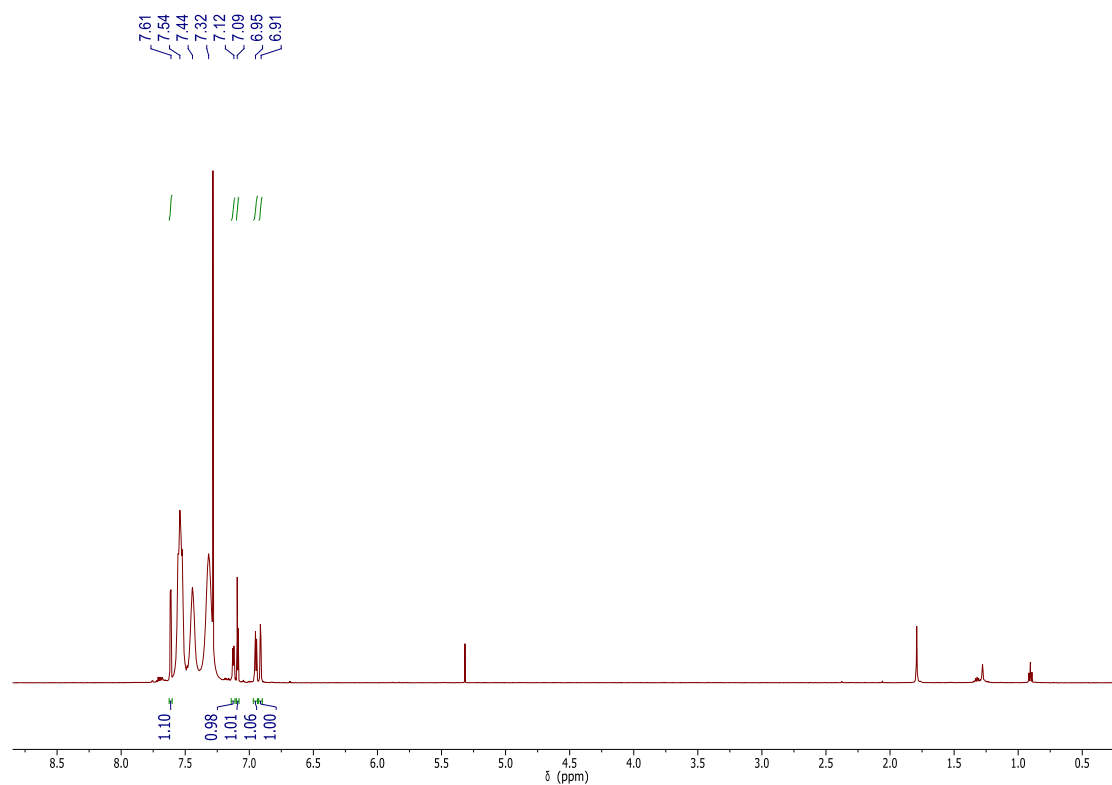

**Figure S21.** <sup>1</sup>H NMR spectrum of **Au<sub>2</sub>-biTh** (CDCl<sub>3</sub>, 600 MHz, 25 °C).

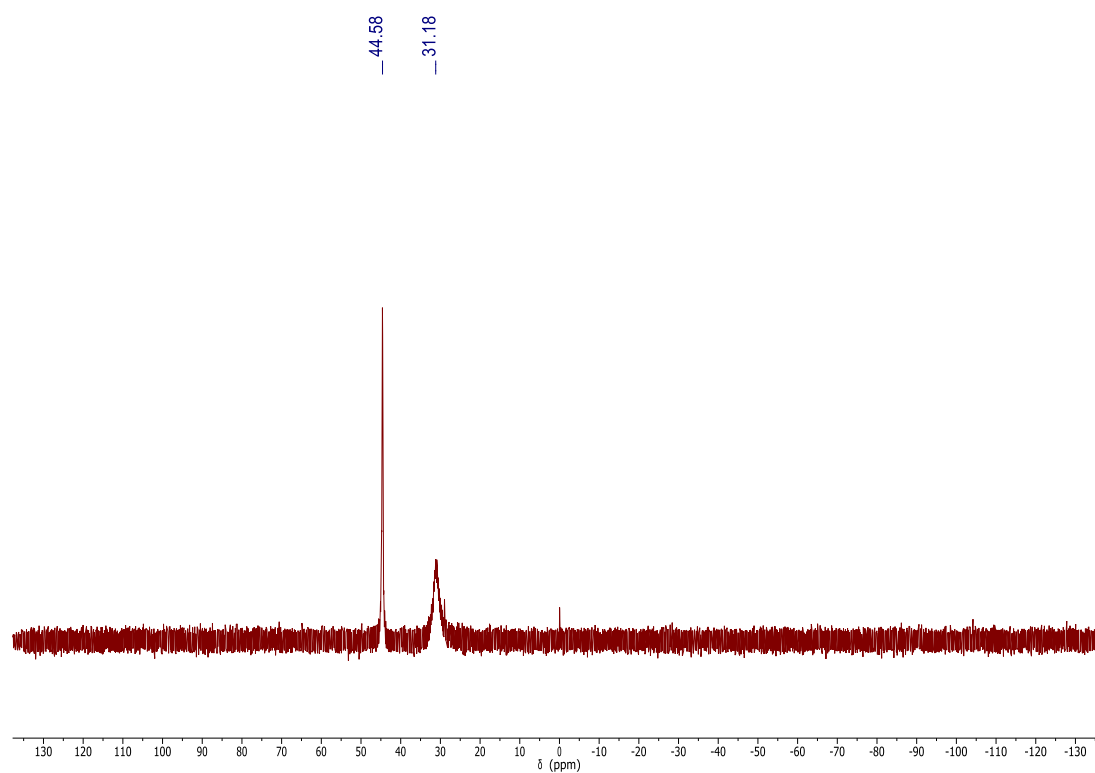

**Figure S22.** <sup>31</sup>P{<sup>1</sup>H} NMR spectrum of **Au<sub>2</sub>-biTh** (CDCl<sub>3</sub>, 243 MHz, 25 °C).

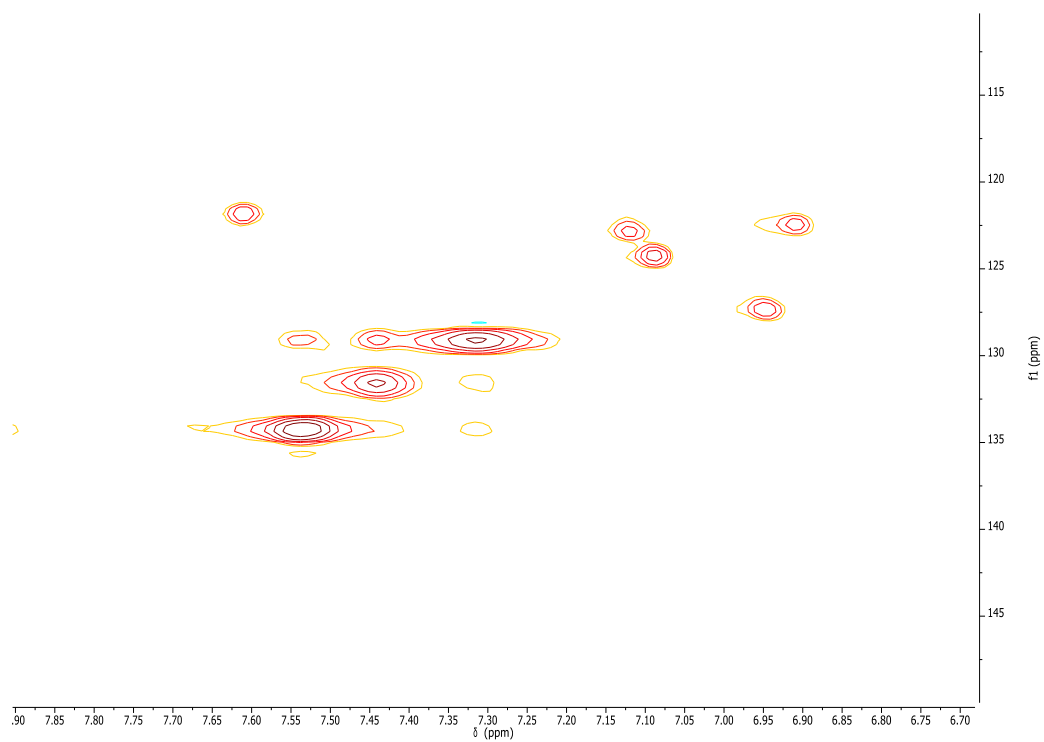

**Figure S23.**  $^1\text{H}$ - $^{13}\text{C}$  gHSQC spectrum of **Au<sub>2</sub>-biTh** ( $\text{CDCl}_3$ , 600 MHz, 25 °C).

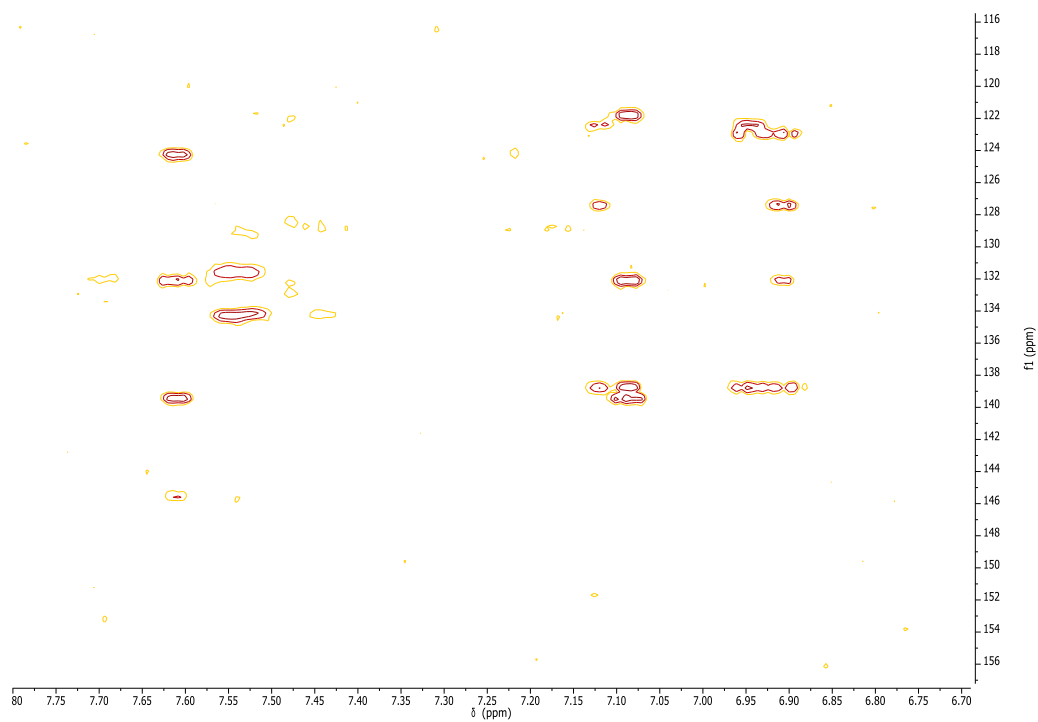

**Figure S24.**  $^1\text{H}$ - $^{13}\text{C}$  gHMBC spectrum of **Au<sub>2</sub>-biTh** ( $\text{CDCl}_3$ , 600 MHz, 25 °C).

## X-Ray Crystallography of **Au<sub>2</sub>-biTh**.

X-Ray Intensity data were collected at 100 K on a Bruker D8 Venture diffractometer using MoK $\alpha$  radiation ( $\lambda = 0.71073$  Å) and a Photon III area detector. Raw data frames were read by program SAINT<sup>6</sup> and integrated using 3D profiling algorithms. The resulting data were reduced to produce hkl reflections and their intensities and estimated standard deviations. The data were corrected for Lorentz and polarization effects and numerical absorption corrections were applied based on indexed and measured faces. The structure was solved and refined in SHELXTL2014, using full-matrix least-squares refinement. The non-H atoms were refined with anisotropic thermal parameters and all of the H atoms were calculated in idealized positions and refined riding on their parent atoms. The Au<sub>2</sub> complex has one thiophene ring disordered and was refined in two parts with their site occupation factors and geometries dependently refined. In the final cycle of refinement, 9551 reflections (of which 8312 are observed with  $I > 2\sigma(I)$ ) were used to refine 497 parameters and the resulting  $R_1$ ,  $wR_2$  and  $S$  (goodness of fit) were 5.75 %, 13.81 % and 1.070, respectively. The refinement was carried out by minimizing the  $wR_2$  function using  $F^2$  rather than  $F$  values.  $R_1$  is calculated to provide a reference to the conventional  $R$  value but its function is not minimized.

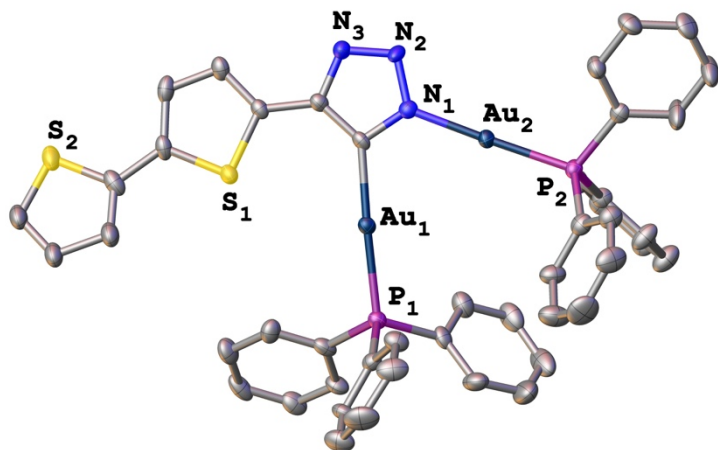

**Figure S25.** Molecular structure of **Au<sub>2</sub>-biTh** (All hydrogen atoms removed for clarity).

**Table S5.** Crystal data and structure refinement for jh1.

|                                         |                                                                    |                          |
|-----------------------------------------|--------------------------------------------------------------------|--------------------------|
| Identification code                     | jh1                                                                |                          |
| Empirical formula                       | $C_{46}H_{35}Au_2N_3P_2S_2$                                        |                          |
| Formula weight                          | 1149.76                                                            |                          |
| Temperature                             | 100(2) K                                                           |                          |
| Wavelength                              | 0.71073 Å                                                          |                          |
| Crystal system                          | Monoclinic                                                         |                          |
| Space group                             | $P2_1/n$                                                           |                          |
| Unit cell dimensions                    | $a = 12.5803(14)$ Å                                                | $a = 90^\circ$ .         |
|                                         | $b = 13.1347(14)$ Å                                                | $b = 100.260(2)^\circ$ . |
|                                         | $c = 25.578(3)$ Å                                                  | $c = 90^\circ$ .         |
| Volume                                  | $4158.8(8)$ Å <sup>3</sup>                                         |                          |
| Z                                       | 4                                                                  |                          |
| Density (calculated)                    | 1.836 Mg/m <sup>3</sup>                                            |                          |
| Absorption coefficient                  | $7.261$ mm <sup>-1</sup>                                           |                          |
| F(000)                                  | 2208                                                               |                          |
| Crystal size                            | $0.170 \times 0.073 \times 0.023$ mm <sup>3</sup>                  |                          |
| Theta range for data collection         | $1.958$ to $27.500^\circ$ .                                        |                          |
| Index ranges                            | $-16 \leq h \leq 16$ , $-17 \leq k \leq 17$ , $-33 \leq l \leq 33$ |                          |
| Reflections collected                   | 127998                                                             |                          |
| Independent reflections                 | 9551 [ $R(\text{int}) = 0.0977$ ]                                  |                          |
| Completeness to $\theta = 25.000^\circ$ | 99.9 %                                                             |                          |
| Absorption correction                   | "multi-scan"                                                       |                          |
| Refinement method                       | Full-matrix least-squares on $F^2$                                 |                          |
| Data / restraints / parameters          | 9551 / 6 / 497                                                     |                          |
| Goodness-of-fit on $F^2$                | 1.070                                                              |                          |
| Final R indices [ $I > 2\sigma(I)$ ]    | $R1 = 0.0575$ , $wR2 = 0.1381$ [8312]                              |                          |
| R indices (all data)                    | $R1 = 0.0668$ , $wR2 = 0.1442$                                     |                          |
| Largest diff. peak and hole             | $6.033$ and $-2.002$ e.Å <sup>-3</sup>                             |                          |



## Synthesis of 4,5-Au<sub>1</sub>-Th.

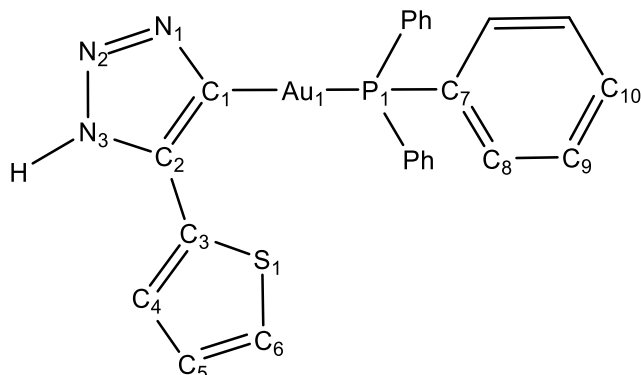

H-C≡C-Th (0.05 mmol) and PPh<sub>3</sub>Au-N<sub>3</sub> (0.05 mmol) were added into 2 mL of DCM. The solution was stirred in the dark for 5 h then solvents was removed *in vacuo*. Crystals were grown through pentane diffusion into a methylene chloride solution of the triazolate at -25 °C. 91.1% Yield (0.046 mmol, 27.77 mg). <sup>1</sup>H NMR (400 MHz, CDCl<sub>3</sub>): δ 7.00 (dd, <sup>3</sup>J<sub>HH</sub> = 3.5, 5.0 Hz, 1H, C<sub>5</sub>-H), 7.06 (dd, <sup>3</sup>J<sub>HH</sub> = 5.0 Hz, <sup>4</sup>J<sub>HH</sub> = 1.2 Hz, 1H, C<sub>4</sub>-H), 7.74 (dd, <sup>3</sup>J<sub>HH</sub> = 3.6 Hz, <sup>4</sup>J<sub>HH</sub> = 1.2 Hz, 1H, C<sub>6</sub>-H), 7.49-7.63 (m, 15H, C<sub>8</sub>-H, C<sub>9</sub>-H and C<sub>10</sub>-H). <sup>13</sup>C{<sup>1</sup>H} NMR (indirect detection through <sup>1</sup>H-<sup>13</sup>C gHMBC and <sup>1</sup>H-<sup>13</sup>C gHSQC (101 MHz, CDCl<sub>3</sub>)): δ 122.1 (C<sub>4</sub>), 122.6 (C<sub>6</sub>), 127.4 (C<sub>5</sub>), 129.3 (d, <sup>3</sup>J<sub>CP</sub> = 11 Hz, C<sub>9</sub>), 129.7 (d, <sup>1</sup>J<sub>CP</sub> = 55 Hz, C<sub>7</sub>), 131.7 (d, <sup>4</sup>J<sub>CP</sub> = 2 Hz, C<sub>10</sub>), 134.3 (d, <sup>2</sup>J<sub>CP</sub> = 13 Hz, C<sub>8</sub>), 137.8 (C<sub>8</sub>), 148.1 (C<sub>9</sub>). <sup>31</sup>P{<sup>1</sup>H} NMR (161 MHz, CDCl<sub>3</sub>): δ 43.50. ESI-MS: m/z calculated for C<sub>24</sub>H<sub>19</sub>AuN<sub>3</sub>PS [M+H]<sup>+</sup> 610.0781, found 610.0762.

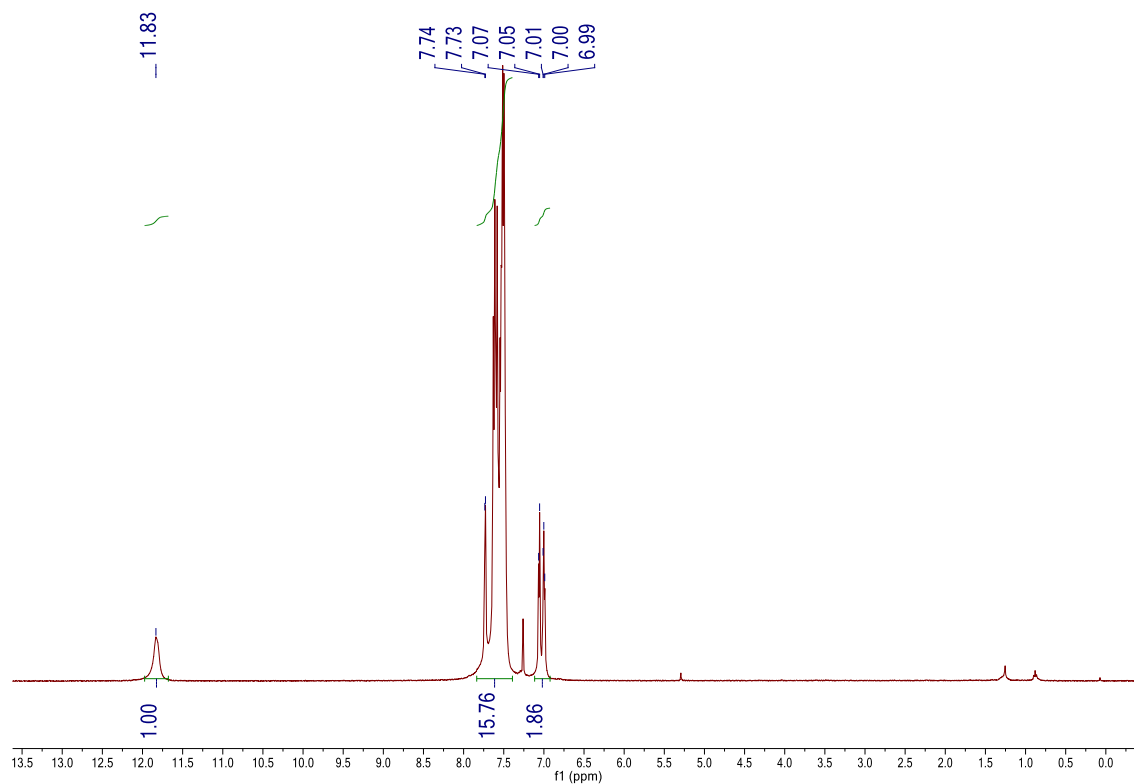

**Figure S26.** <sup>1</sup>H NMR spectrum of **4,5-Au<sub>1</sub>-Th** (CDCl<sub>3</sub>, 400 MHz, 25 °C).

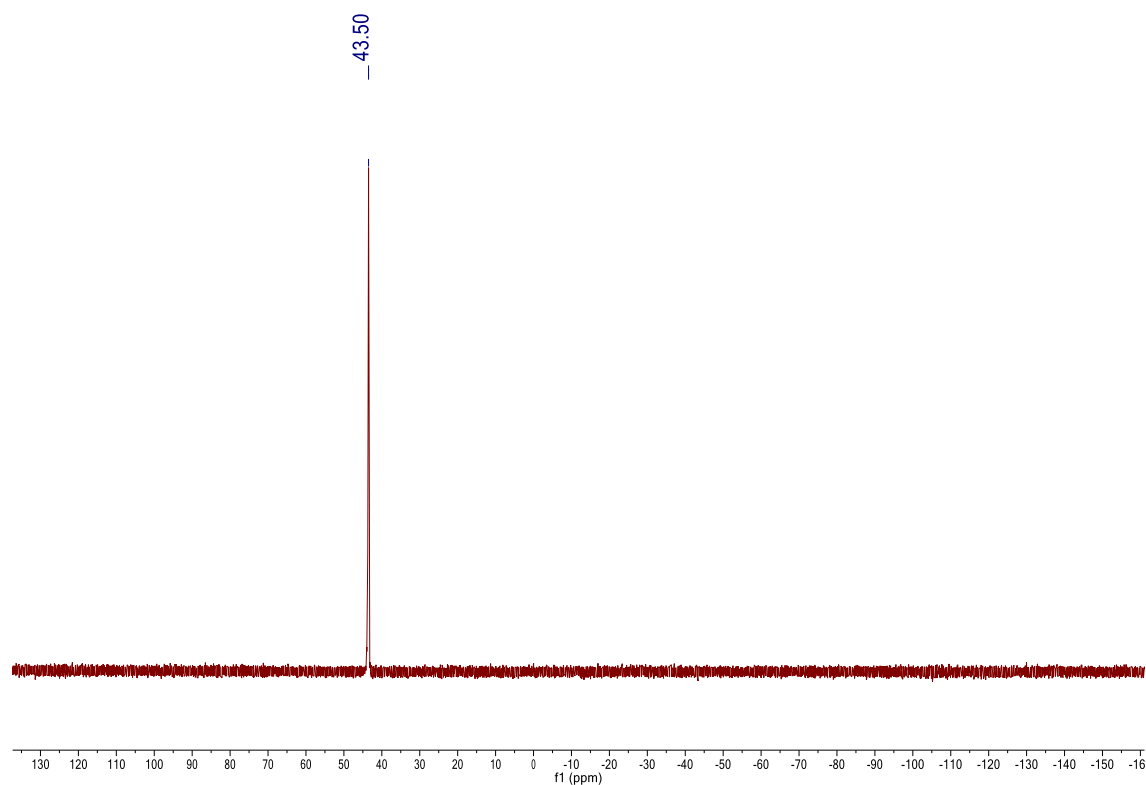

**Figure S27.** <sup>31</sup>P{<sup>1</sup>H} NMR spectrum of **4,5-Au<sub>1</sub>-Th** (CDCl<sub>3</sub>, 161 MHz, 25 °C).

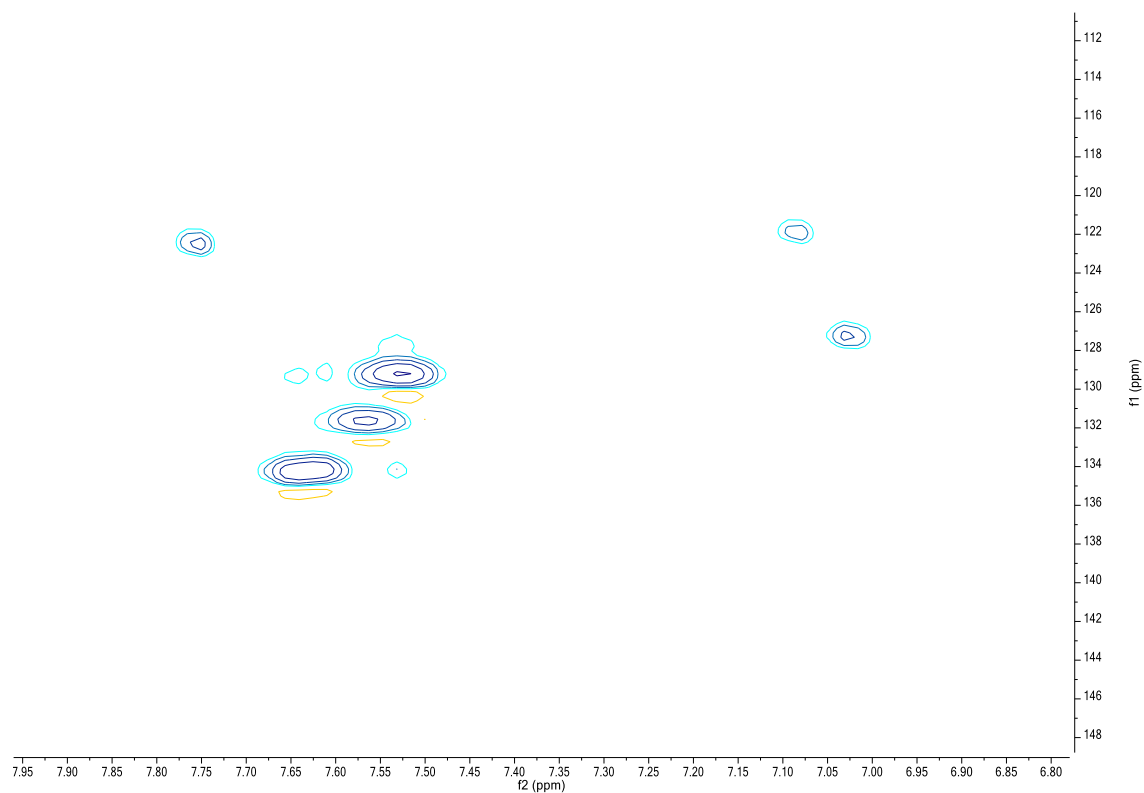

**Figure S28.**  $^1\text{H}$ - $^{13}\text{C}$  gHSQC spectrum of **4,5-Au<sub>1</sub>-Th** ( $\text{CDCl}_3$ , 400 MHz, 25 °C).

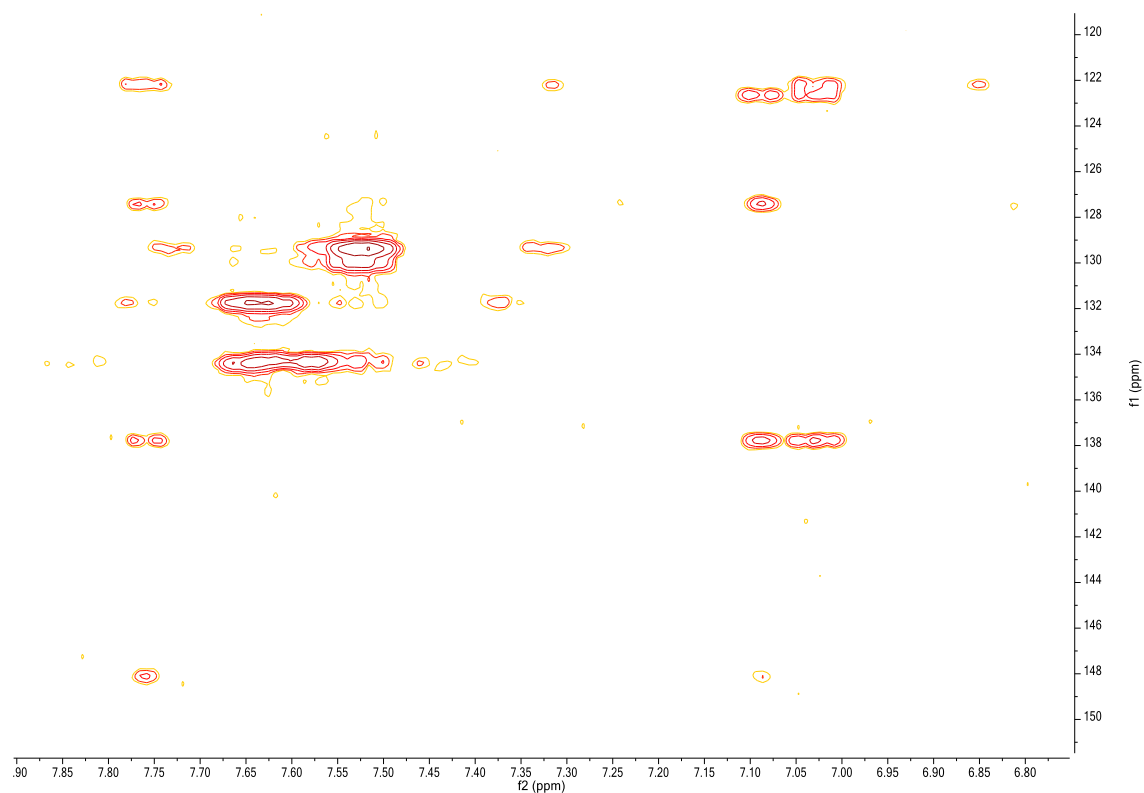

**Figure S29.**  $^1\text{H}$ - $^{13}\text{C}$  gHMBC spectrum of **4,5-Au<sub>1</sub>-Th** ( $\text{CDCl}_3$ , 400 MHz, 25 °C).

## X-Ray Crystallography of **4,5-Au<sub>1</sub>-Th**.

X-Ray Intensity data were collected at 173(2) K on a Bruker DV8 Venture diffractometer using MoK $\alpha$  radiation ( $\lambda = 0.71073$  Å) and a Photon III area detector. Raw data frames were read by program SAINT<sup>6</sup> and integrated using 3D profiling algorithms. The resulting data were reduced to produce hkl reflections and their intensities and estimated standard deviations. The data were corrected for Lorentz and polarization effects and numerical absorption corrections were applied based on indexed and measured faces. The structure was solved and refined in *SHELXTL2014*, using full-matrix least-squares refinement. The non-H atoms were refined with anisotropic thermal parameters and all of the H atoms were calculated in idealized positions and refined riding on their parent atoms. The asymmetric unit consists of two Au complexes and three dichloromethane solvent molecules. There are three disordered regions. A phenyl ring in molecule A and part of the thiophene in molecule B where both disorders were refined in two parts in each case. Additionally, one of the dichloromethane molecules is also refined in two parts. The protons on the nitrogen atoms in both molecules were obtained from a Difference Fourier map and refined freely. In the final cycle of refinement, 19408 reflections (of which 16243 are observed with  $I > 2 \sigma(I)$ ) were used to refine 585 parameters and the resulting  $R_1$ ,  $wR_2$  and  $S$  (goodness of fit) were 3.86 %, 8.78 % and 1.044, respectively. The refinement was carried out by minimizing the  $wR_2$  function using  $F^2$  rather than  $F$  values.  $R_1$  is calculated to provide a reference to the conventional  $R$  value but its function is not minimized.

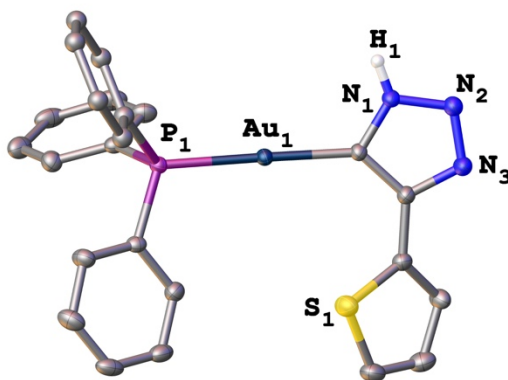

**Figure S30.** Molecular structure of **4,5-Au<sub>1</sub>-Th** (Hydrogen atoms removed for clarity).

**Table S6.** Crystal data and structure refinement for shen5.

|                                   |                                                                        |                                            |
|-----------------------------------|------------------------------------------------------------------------|--------------------------------------------|
| Identification code               | shen5                                                                  |                                            |
| Empirical formula                 | C <sub>25.50</sub> H <sub>22</sub> AuCl <sub>3</sub> N <sub>3</sub> PS |                                            |
| Formula weight                    | 736.81                                                                 |                                            |
| Temperature                       | 173(2) K                                                               |                                            |
| Wavelength                        | 0.71073 Å                                                              |                                            |
| Crystal system                    | Monoclinic                                                             |                                            |
| Space group                       | P2 <sub>1</sub> /c                                                     |                                            |
| Unit cell dimensions              | a = 14.4013(5) Å<br>b = 22.8626(8) Å<br>c = 17.4326(5) Å               | a = 90°.<br>b = 111.0532(11)°.<br>c = 90°. |
| Volume                            | 5356.6(3) Å <sup>3</sup>                                               |                                            |
| Z                                 | 8                                                                      |                                            |
| Density (calculated)              | 1.827 Mg/m <sup>3</sup>                                                |                                            |
| Absorption coefficient            | 5.950 mm <sup>-1</sup>                                                 |                                            |
| F(000)                            | 2856                                                                   |                                            |
| Crystal size                      | 0.202 x 0.084 x 0.037 mm <sup>3</sup>                                  |                                            |
| Theta range for data collection   | 1.815 to 33.291°.                                                      |                                            |
| Index ranges                      | -21 ≤ h ≤ 22, -35 ≤ k ≤ 35, -26 ≤ l ≤ 25                               |                                            |
| Reflections collected             | 188156                                                                 |                                            |
| Independent reflections           | 19408 [R(int) = 0.0534]                                                |                                            |
| Completeness to theta = 25.242°   | 99.8 %                                                                 |                                            |
| Absorption correction             | Integration                                                            |                                            |
| Max. and min. transmission        | 0.8588 and 0.5166                                                      |                                            |
| Refinement method                 | Full-matrix least-squares on F <sup>2</sup>                            |                                            |
| Data / restraints / parameters    | 19408 / 8 / 585                                                        |                                            |
| Goodness-of-fit on F <sup>2</sup> | 1.044                                                                  |                                            |
| Final R indices [I > 2sigma(I)]   | R1 = 0.0386, wR2 = 0.0878 [16243]                                      |                                            |
| R indices (all data)              | R1 = 0.0507, wR2 = 0.0939                                              |                                            |
| Extinction coefficient            | n/a                                                                    |                                            |
| Largest diff. peak and hole       | 5.391 and -2.311 e.Å <sup>-3</sup>                                     |                                            |

## 2. Fluorescence of Au<sub>2</sub>-Th and 4,5-Au<sub>1</sub>-Th

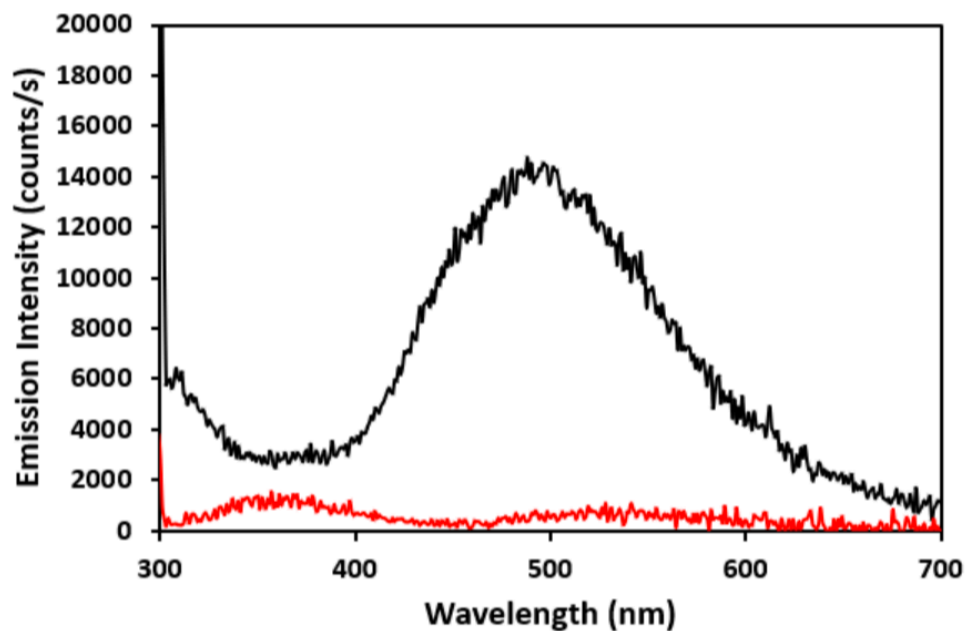

**Figure S31.** Photoluminescence spectra of **Au<sub>2</sub>-Th** (black line) and **4,5-Au<sub>1</sub>-Th** (red line) at room temperature in THF under air saturated conditions, showing trace fluorescence that is indicative of an aurophilic interaction in the digold compound that is not present in the monogold triazolate.

### 3. Computational Results

#### Validation of Trimethyl Phosphine Ligands

For the modeling of all compounds, triphenyl phosphine ligands were reduced to trimethyl phosphine ligands to reduce computational costs. Considering that the aryl ligands themselves may contribute as photophysically active chromophores, it is necessary to validate that this reduction in molecular complexity does not impact the computational results described herein. For this purpose, a model compound of  $\text{Au}_2\text{-Th}$  with triphenyl phosphine ligands was subjected to the same computational interrogation as the reduced species described in the main text. The results found minimal discrepancies, with the charge difference densities (CDDs), maintaining LMCT character (albeit with a newfound contribution from the triphenyl phosphine ligands) and the calculated absorption spectrum showing no shift with respect to the trimethyl phosphine variety of **Au<sub>2</sub>-Th**. Additionally, the bulkier triphenyl phosphine ligands do not appear to preclude aurophilic bonding in the relaxed excited state geometry.

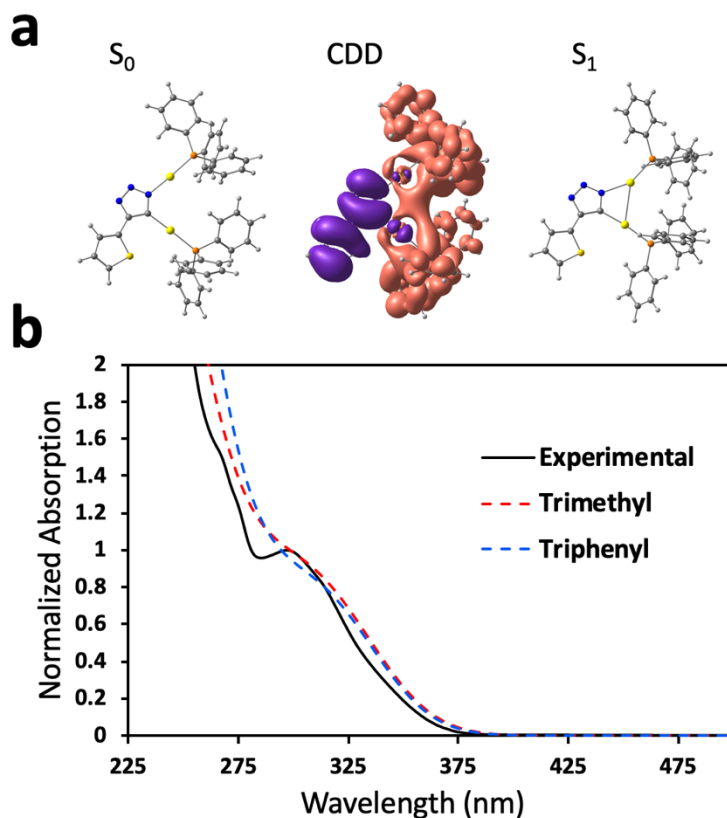

**Figure S32.** Shown here are the results of CAM-B3LYP calculations to produce the optimized ground state geometry, CDD, and relaxed excited state geometry (a) of **Au<sub>2</sub>-Th** with triphenyl phosphine ligands; and the calculated absorption spectrum (b) compared to experiment and to **Au<sub>2</sub>-Th** using trimethyl phosphine ligands.

## Calculated Absorption Spectra

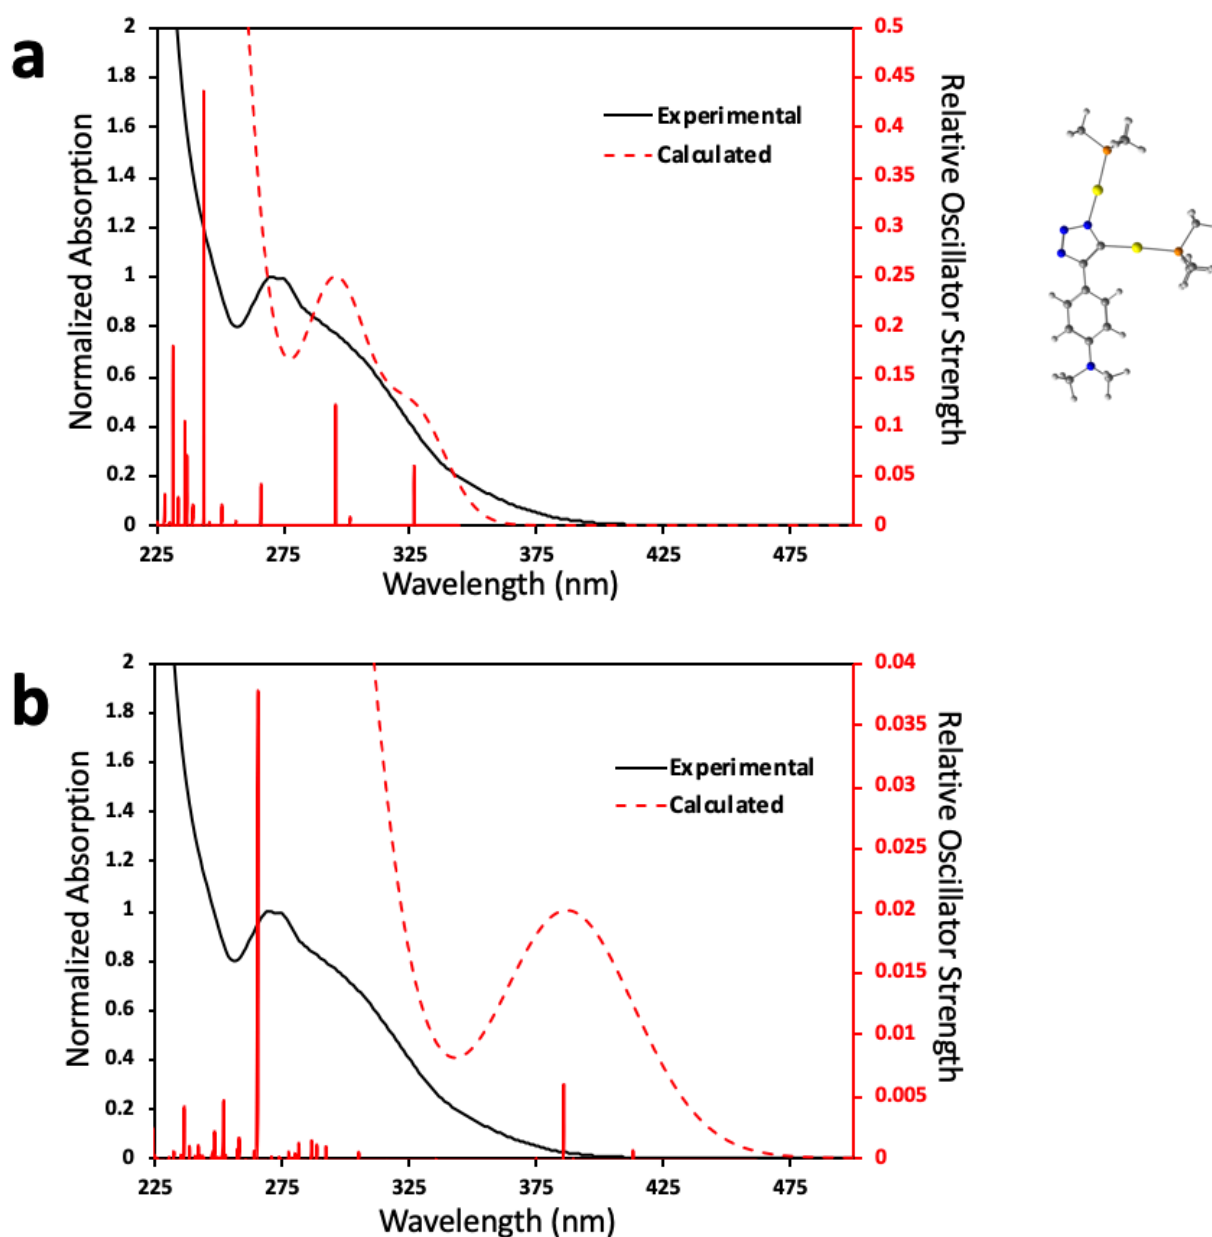

**Figure S33.** Experimental (black line) and calculated (red lines) absorption spectra of  $\text{Au}_2\text{-PhNMe}_2$  using CAM-B3LYP (a) and with B3LYP (b). The dashed line shows artificially broadened spectra using gaussian functions (FWHM = 25 nm for a and 50 nm for b).



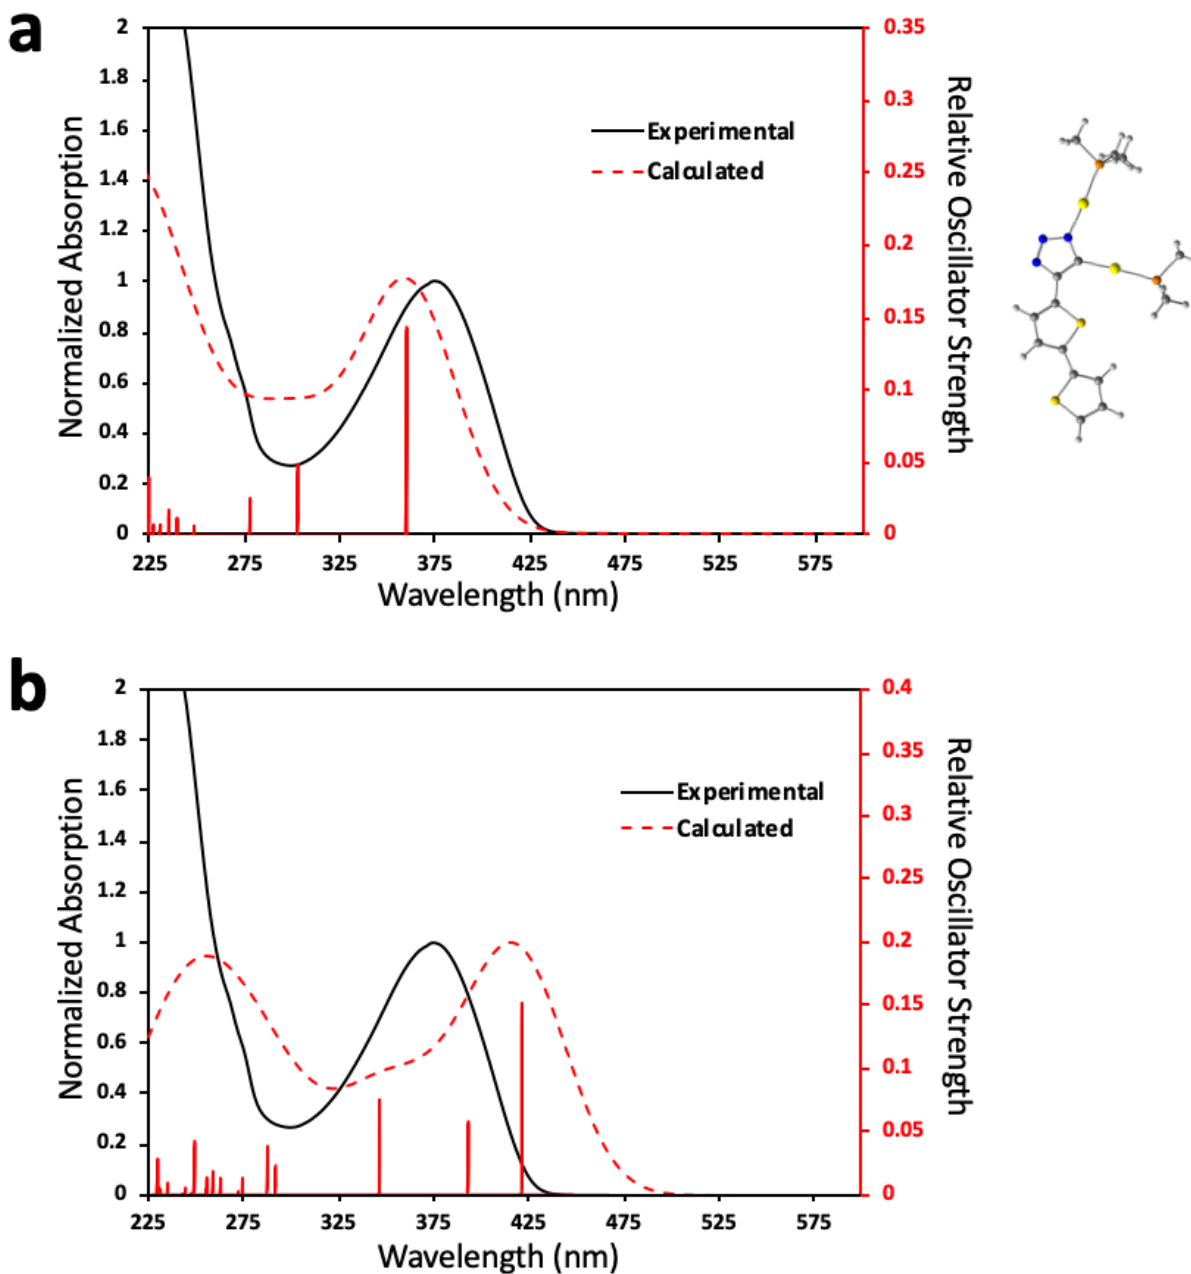

**Figure S34.** Experimental (black line) and calculated (red lines) absorption spectra of  $\text{Au}_2\text{-biTh}$  using CAM-B3LYP (a) and with B3LYP (b). The dashed line shows artificially broadened spectra using gaussian functions (FWHM = 50 nm).

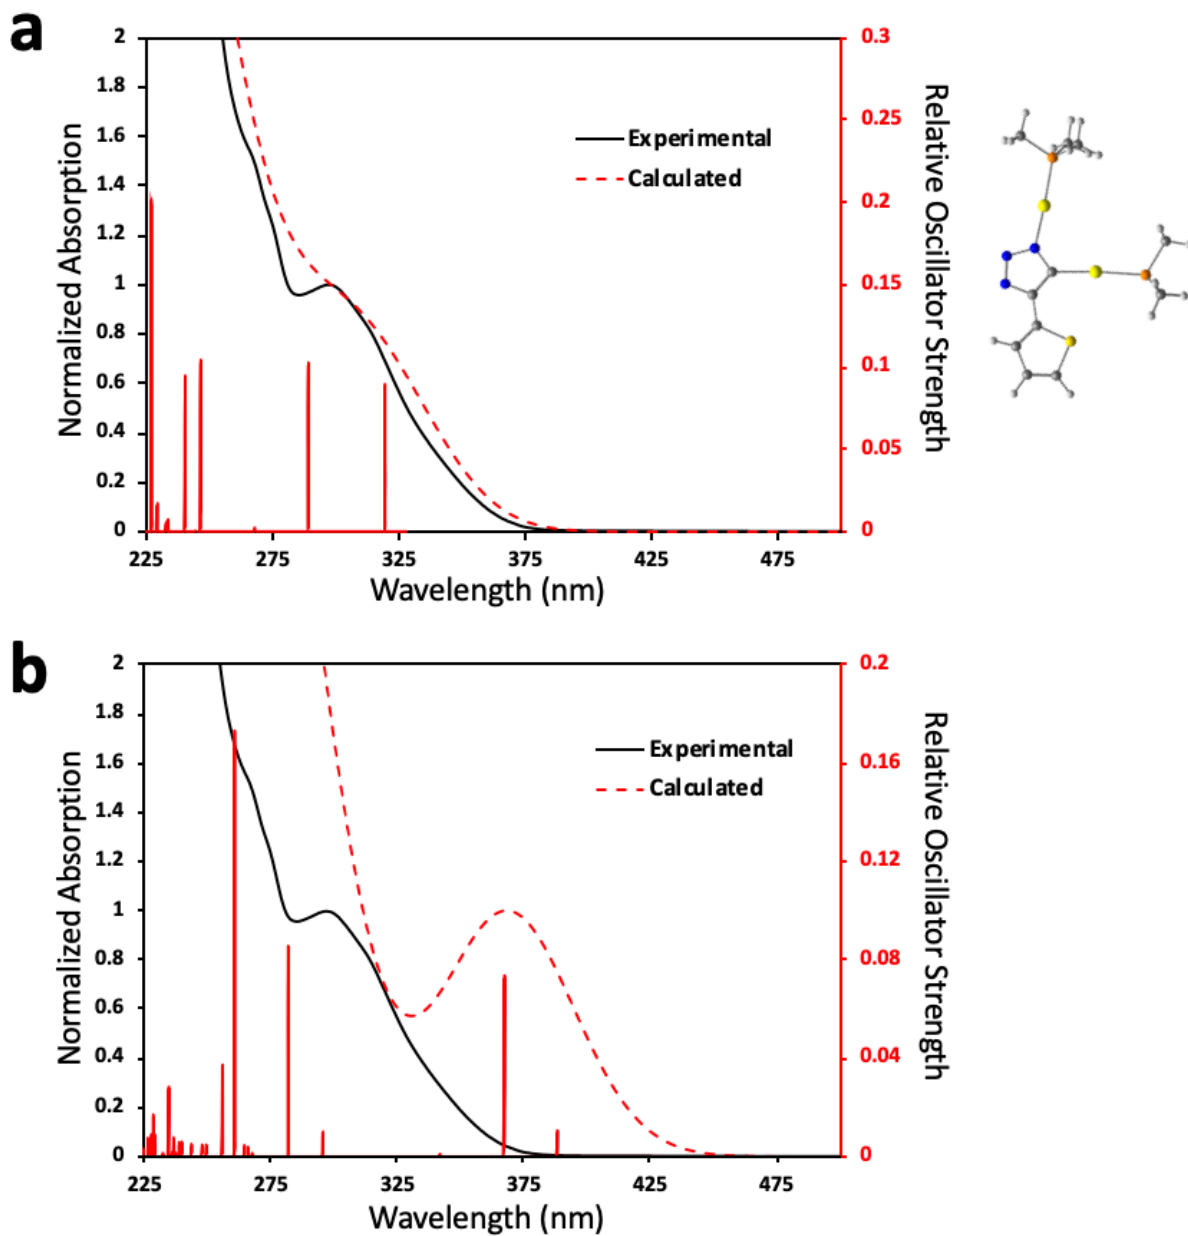

**Figure S35.** Experimental (black line) and calculated (red lines) absorption spectra of  $\text{Au}_2\text{-Th}$  using CAM-B3LYP (a) and with B3LYP (b). The dashed line shows artificially broadened spectra using gaussian functions (FWHM = 50 nm).

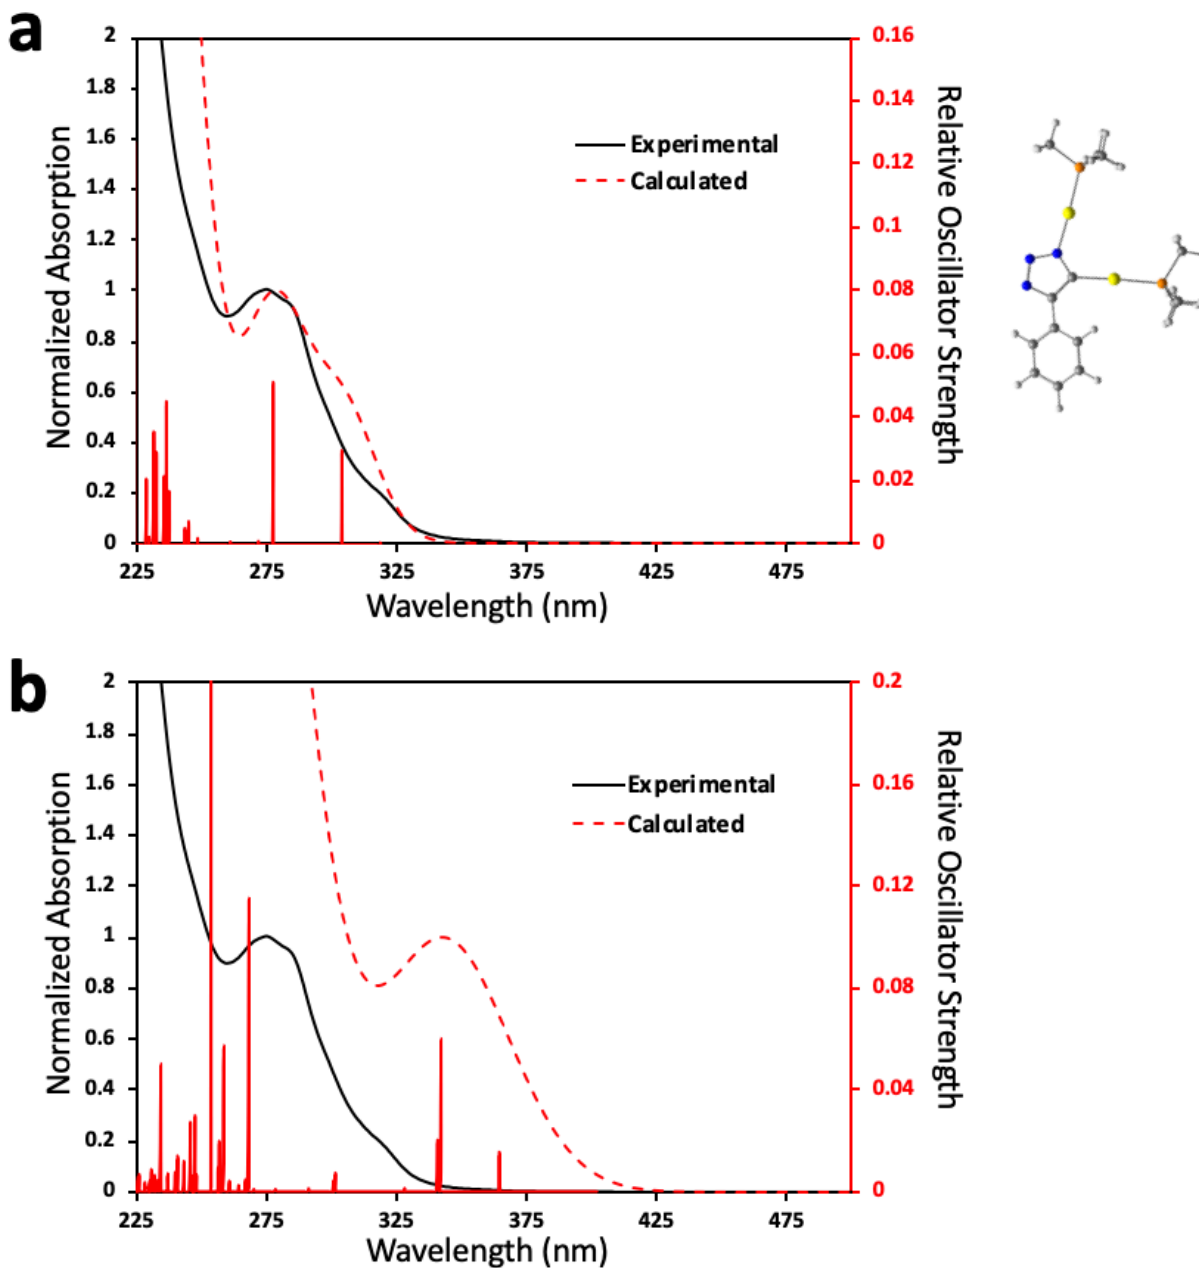

**Figure S36.** Experimental (black line) and calculated (red lines) absorption spectra of  $\text{Au}_2\text{-Ph}$  using CAM-B3LYP (a) and with B3LYP (b). The dashed line shows artificially broadened spectra using gaussian functions (FWHM = 25 nm for a and 50 nm for b).

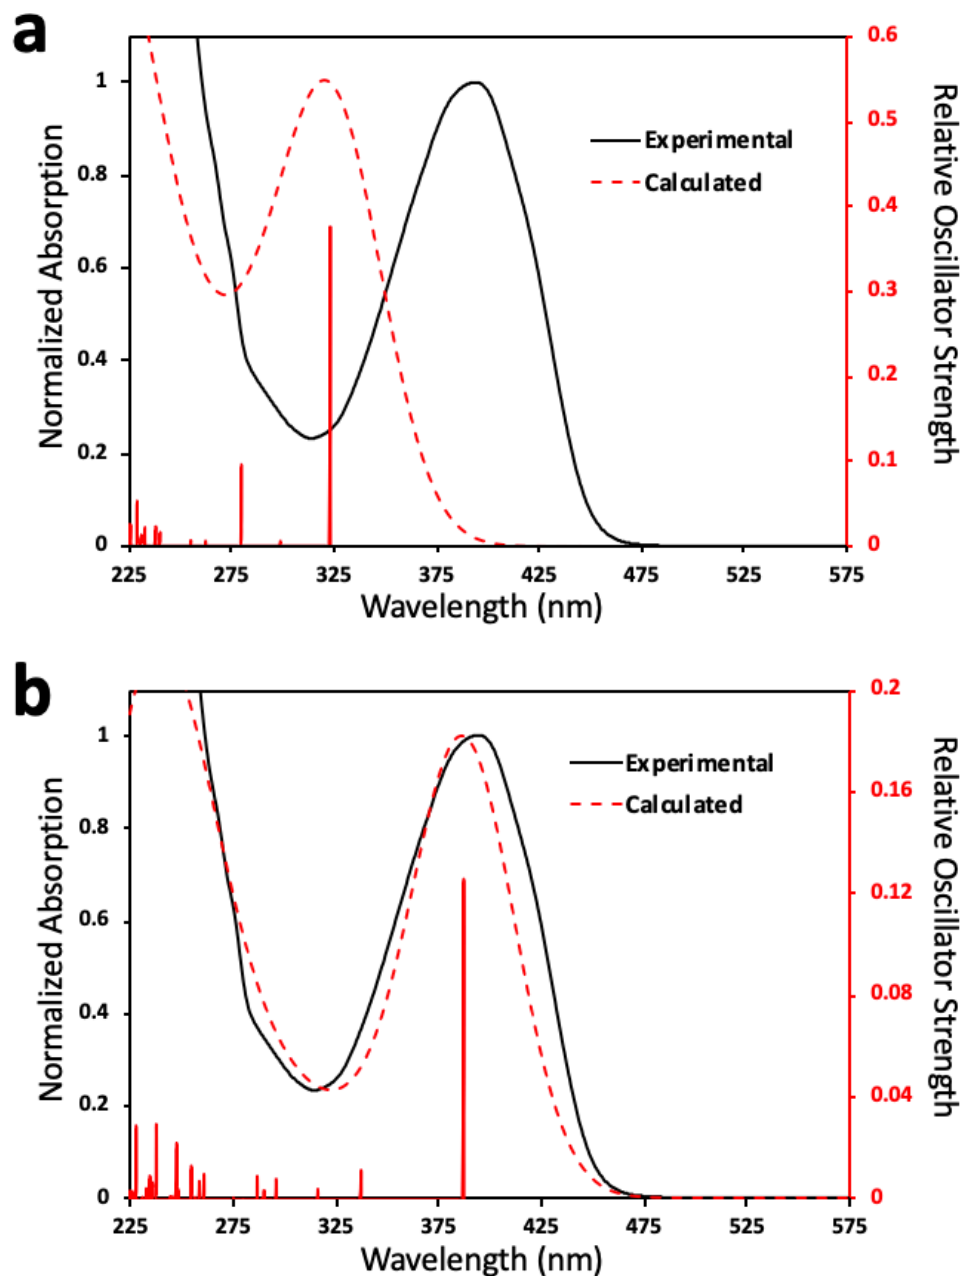

**Figure S37.** Experimental (black line) and calculated (red lines) absorption spectra of  $\text{Au}_2\text{-PhNO}_2$  using CAM-B3LYP (a) and with B3LYP (b). The dashed line shows artificially broadened spectra using gaussian functions (FWHM = 50 nm).

## Full Disclosure

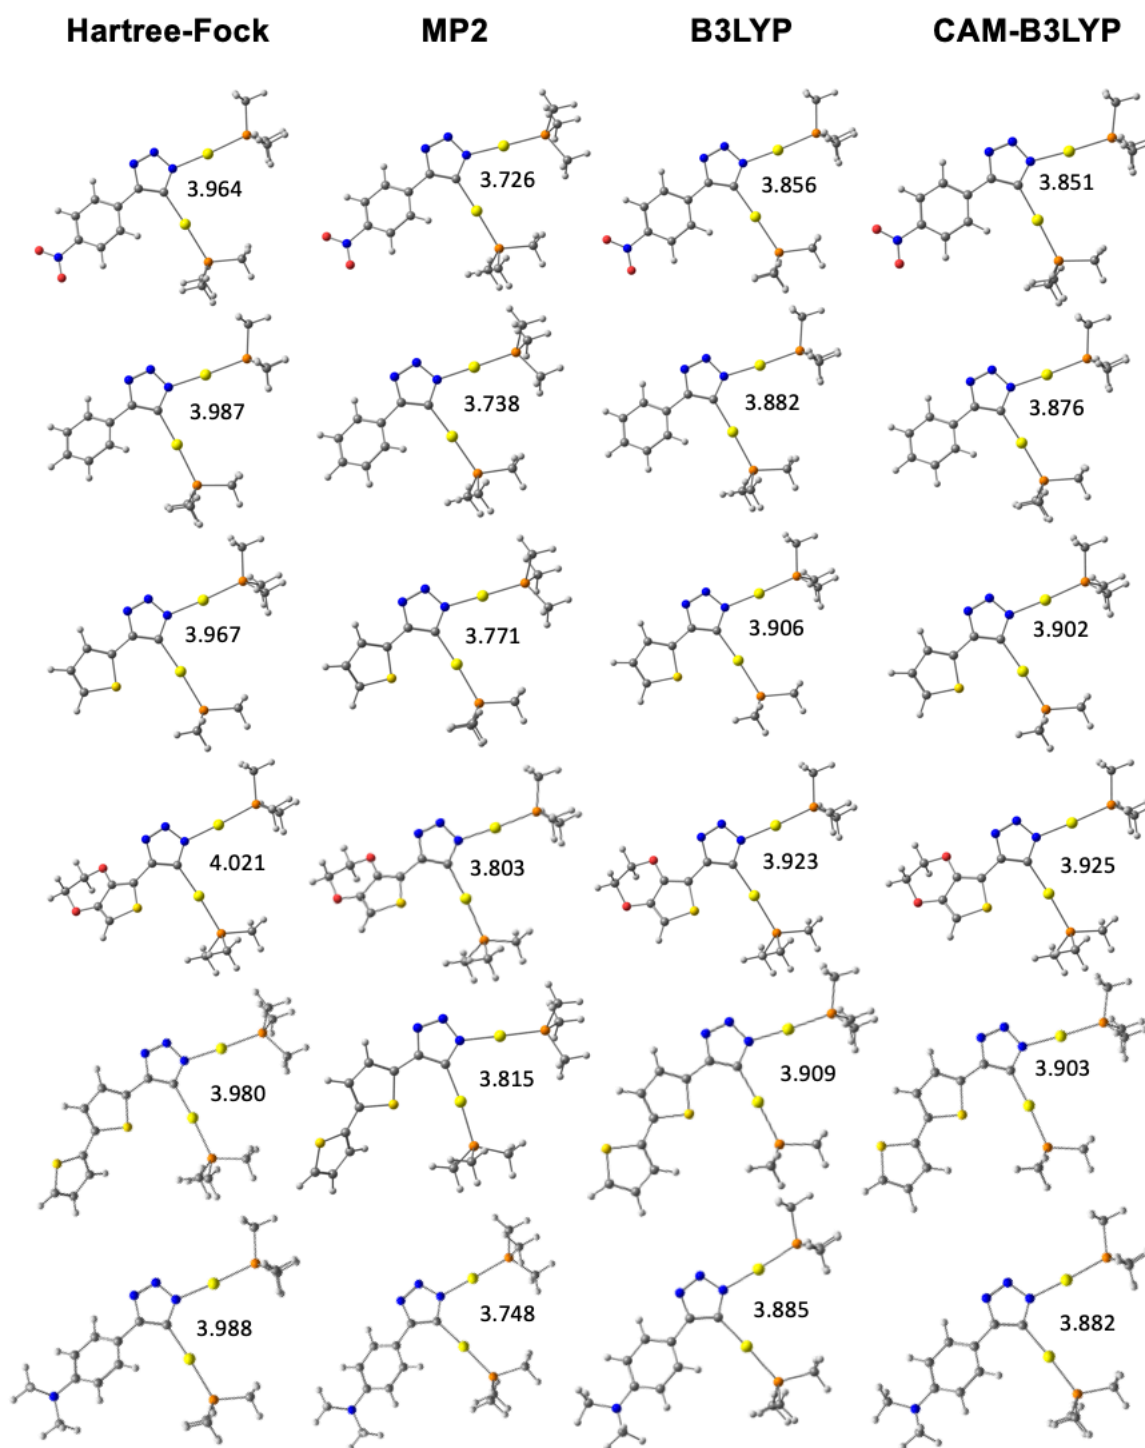

**Figure S38.** Optimized ground state ( $S_0$ ) geometries of digold triazolates by different levels of theory. The numbers show interatomic Au(I)-Au(I) distances in Angstroms. Shown in descending order are **Au<sub>2</sub>-PhNO<sub>2</sub>**, **Au<sub>2</sub>-Ph**, **Au<sub>2</sub>-Th**, **Au<sub>2</sub>-EDOT**, **Au<sub>2</sub>-biTh**, and **Au<sub>2</sub>-PhNMe<sub>2</sub>**.

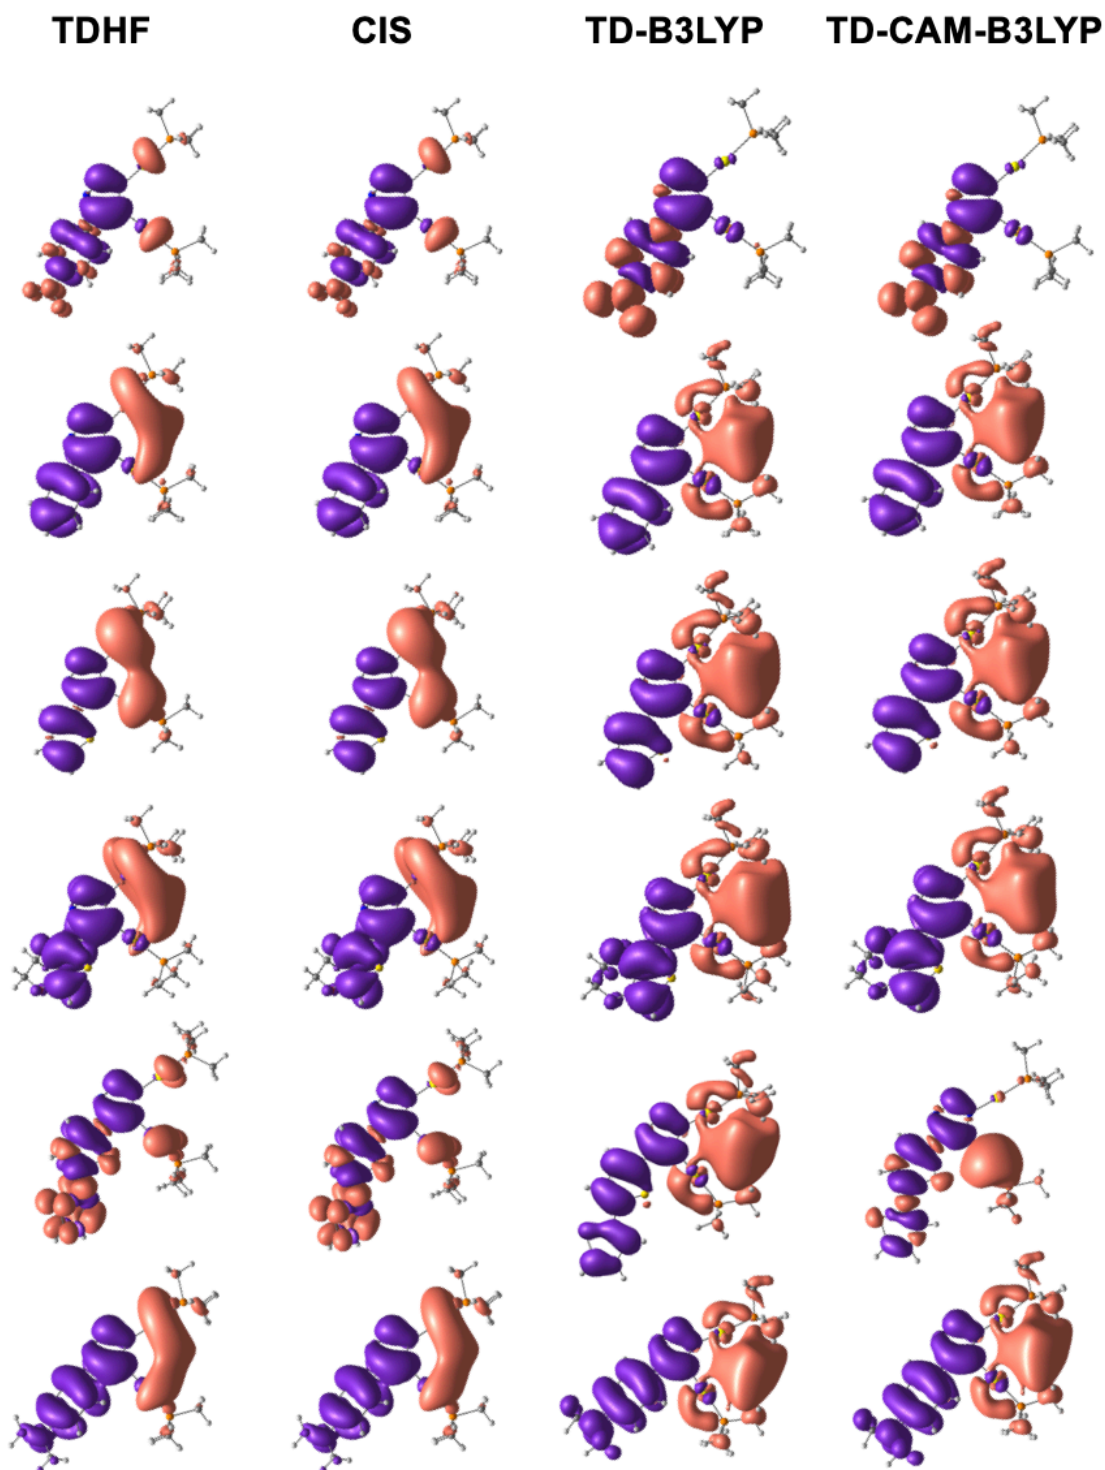

**Figure S39.** Charge difference densities (CDDs) of the lowest energy electronic excited state ( $S_1$ ) of digold triazoles by different methods. Shown in descending order are **Au<sub>2</sub>-PhNO<sub>2</sub>**, **Au<sub>2</sub>-Ph**, **Au<sub>2</sub>-Th**, **Au<sub>2</sub>-EDOT**, **Au<sub>2</sub>-biTh**, and **Au<sub>2</sub>-PhNMe<sub>2</sub>**.

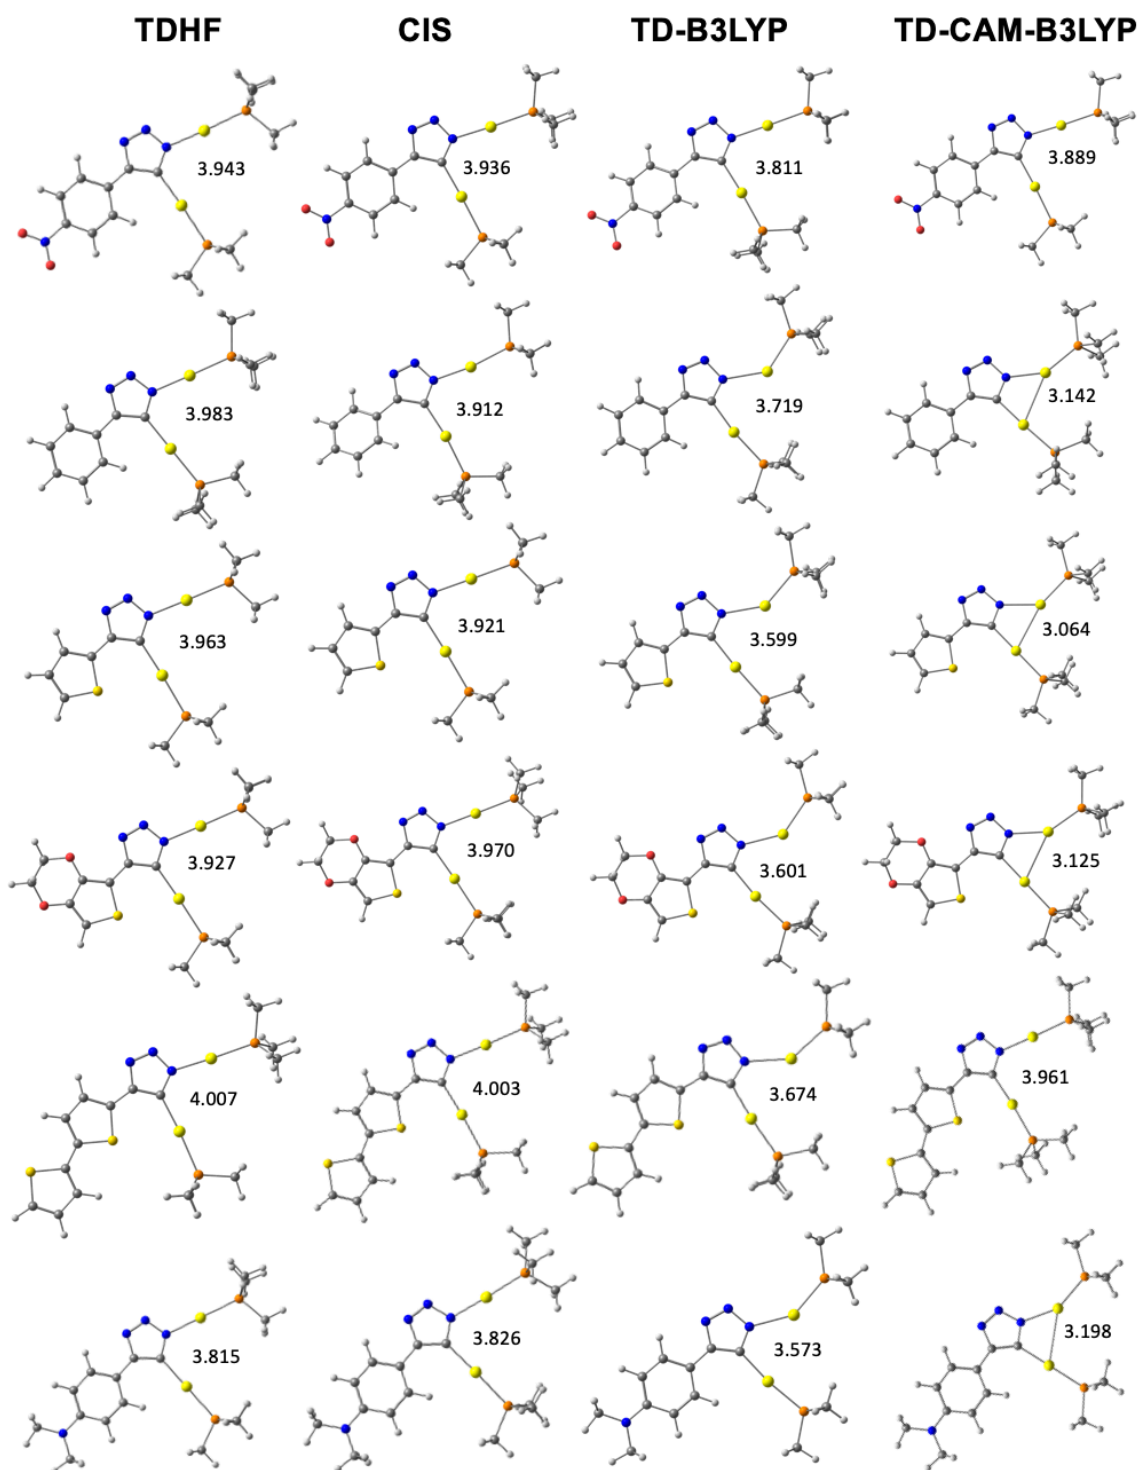

**Figure S40.** Optimized excited state ( $S_1$ ) geometries of digold triazolates by different levels of theory. The numbers show interatomic Au(I)-Au(I) distances in Angstroms. Shown in descending order are **Au<sub>2</sub>-PhNO<sub>2</sub>**, **Au<sub>2</sub>-Ph**, **Au<sub>2</sub>-Th**, **Au<sub>2</sub>-EDOT**, **Au<sub>2</sub>-biTh**, and **Au<sub>2</sub>-PhNMe<sub>2</sub>**.



## Orbital Analysis

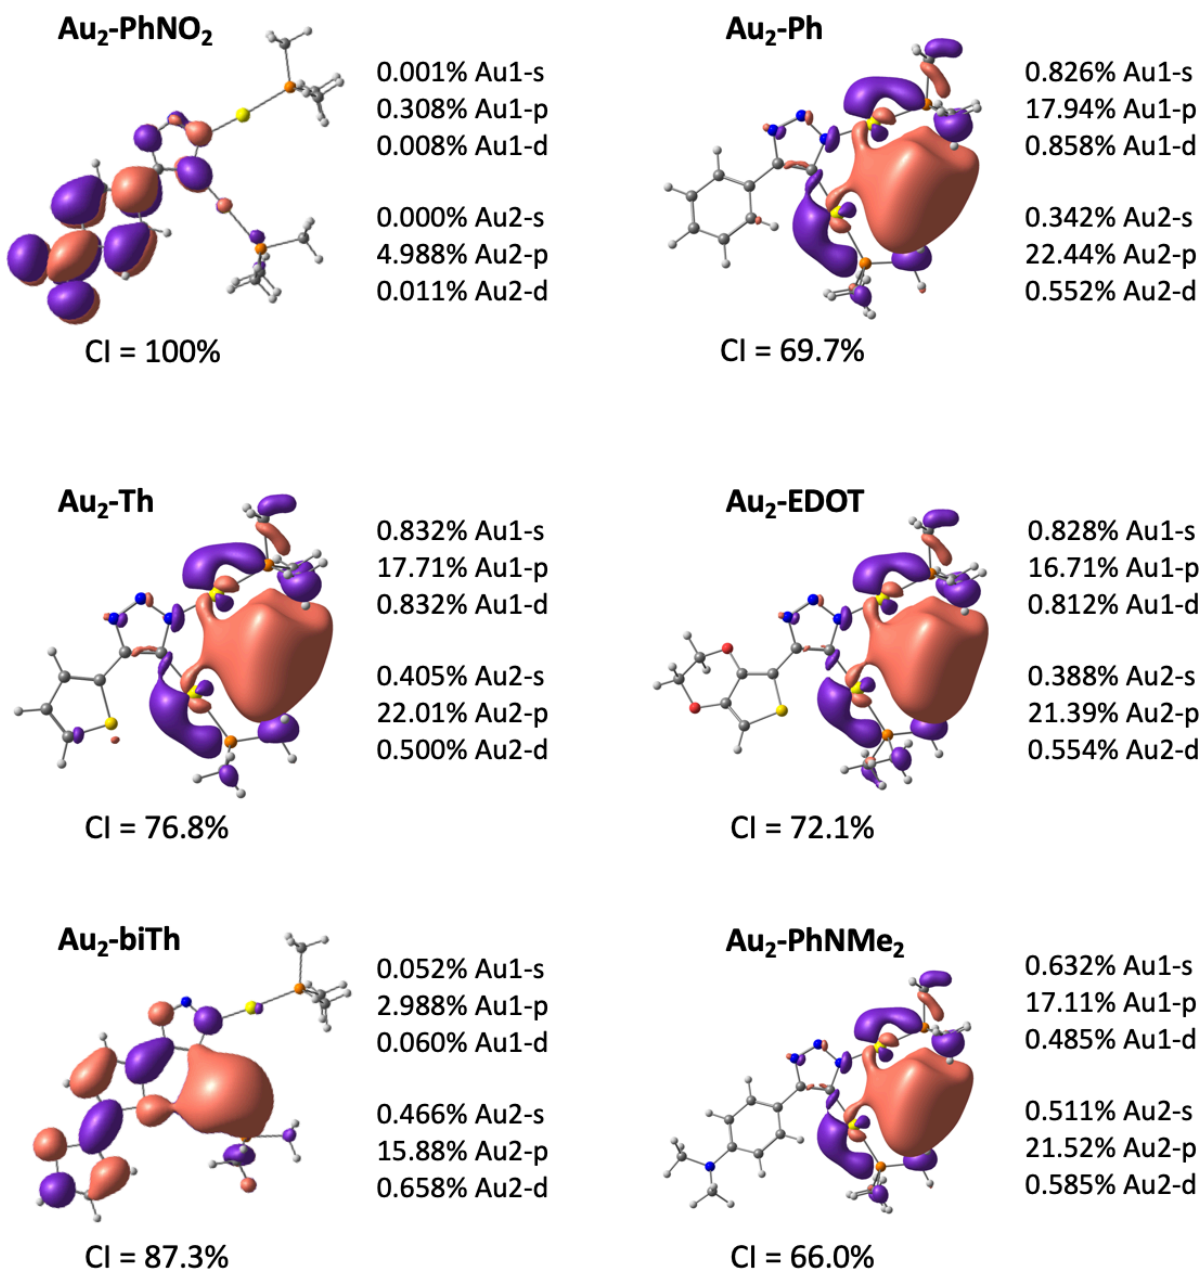

**Figure S41.** Shown here are the unoccupied (virtual) molecular orbitals (MOs) from the results of CAM-B3LYP calculations that contributed most heavily to the configuration interaction (CI) of the excited state,  $S_1$ , for all compounds. Written below each MO is the percent contribution (CI = X%) of one-electron transitions to this orbital. The atomic orbital compositions from Au atoms are displayed to the right of each MO, divided into percent s, p, and d character.



## Triplet States

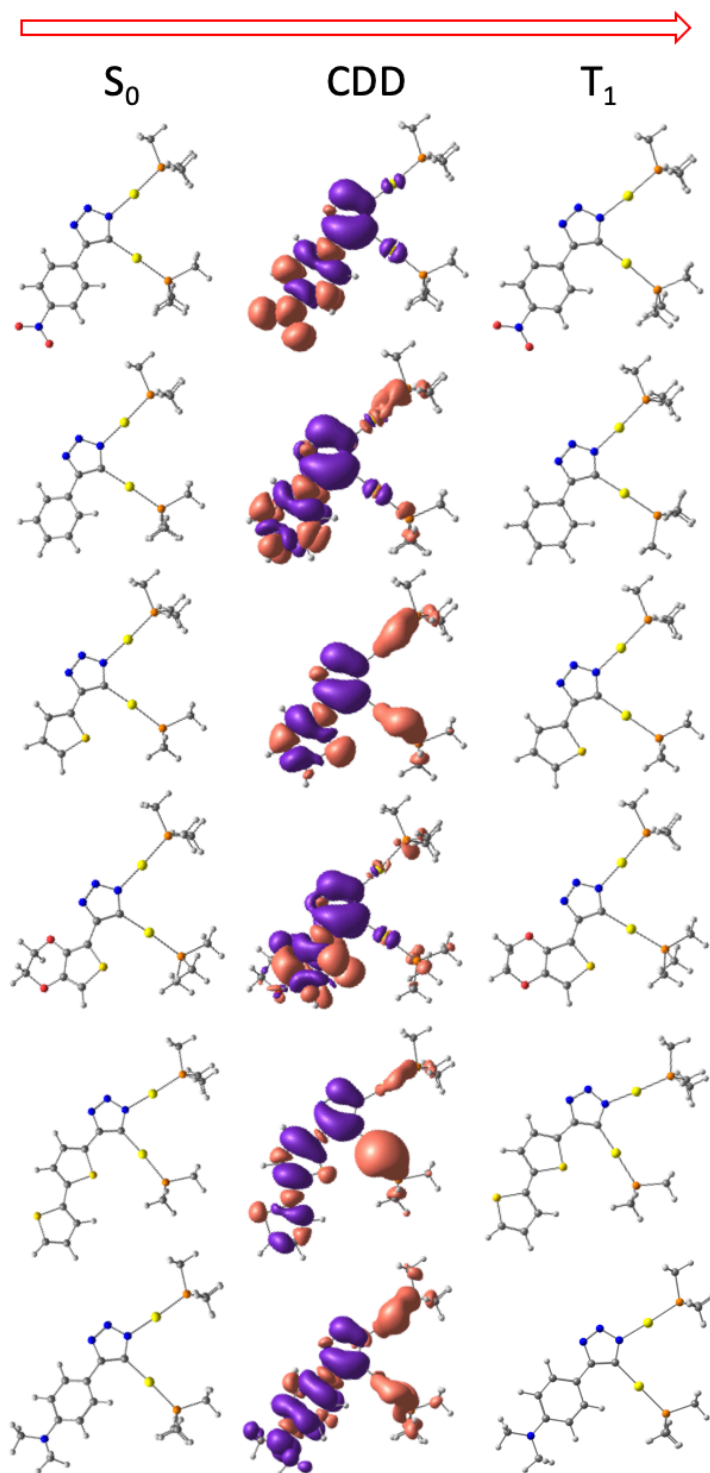

**Figure S42.** The results of a geometry optimizations of the singlet multiplicity ground state ( $S_0$ ), the CDD of the lowest lying excited triplet state identified by TDDFT, and the relaxed geometry of that excited state using CAM-B3LYP.

#### 4. References

- (1) H. C. Kolb, M. G. Finn, K. B. Sharpless, *Angew. Chem., Int. Ed.*, **2001**, *40*, 2004–2021.
- (2) R. Huisgen, *1,3-Dipolar Cycloaddition Chemistry*, A. Padwa, Wiley, New York, **1984**, pp. 1–176.
- (3) I. R. Whittall, M. G. Humphrey, S. Houbrechts, A. Persoons, D. C. R. Hockless, *Organometallics*, **1996**, *15*, 5738–5745.
- (4) M. Frigoli, C. Moustrou, A. Samat, R. Guglielmetti, *Helvetica*. **2000**, *83*, 3043–3052.
- (5) P. Li, B. Ahrens, K. Choi, M. Khan, P. R. Raithby, P. J. Wilson, W. Wong. *CrystEngComm.*, **2002**, *4*, 405–412.
- (6) T. J. Del Castillo, S. Sarkar, K. A. Abboud, A. S. Veige, *Dalton Trans.*, **2011**, *40*, 8140–8144.
- (7) A. R. Powers, I. Ghiviriga, K. A. Abboud, A. S. Veige. *Dalton Trans.*, **2015**, *44*, 14747–14752.
- (8) *SHELXTL6* (2008). Bruker-AXS, Madison, Wisconsin, USA.
